# Supplementary material for: ‘It's all about patient safety’: an ethnographic study of how pharmacy staff construct medicines safety in the context of polypharmacy
Source: PubMed Central journal article supplement (PMC7925910; doi:10.1136/bmjopen-2020-042504), 2021-02-05
Supplement: bmjopen-2020-042504.draft_revisions.pdf [file bmjopen-2020-042504.draft_revisions.pdf]

# BMJ Open

BMJ Open is committed to open peer review. As part of this commitment we make the peer review history of every article we publish publicly available.

When an article is published we post the peer reviewers' comments and the authors' responses online. We also post the versions of the paper that were used during peer review. These are the versions that the peer review comments apply to.

The versions of the paper that follow are the versions that were submitted during the peer review process. They are not the versions of record or the final published versions. They should not be cited or distributed as the published version of this manuscript.

BMJ Open is an open access journal and the full, final, typeset and author-corrected version of record of the manuscript is available on our site with no access controls, subscription charges or pay-per-view fees (<http://bmjopen.bmj.com>).

If you have any questions on BMJ Open's open peer review process please email [info.bmjopen@bmj.com](mailto:info.bmjopen@bmj.com)

# BMJ Open

## **“It’s all about patient safety”: an ethnographic study of how pharmacy staff construct medicines safety in the context of polypharmacy.**

|                               |                                                                                                                                                                                           |
|-------------------------------|-------------------------------------------------------------------------------------------------------------------------------------------------------------------------------------------|
| Journal:                      | <i>BMJ Open</i>                                                                                                                                                                           |
| Manuscript ID                 | bmjopen-2020-042504                                                                                                                                                                       |
| Article Type:                 | Original research                                                                                                                                                                         |
| Date Submitted by the Author: | 06-Jul-2020                                                                                                                                                                               |
| Complete List of Authors:     | Fudge, Nina ; Queen Mary University of London, Institute of Population Health Sciences<br>Swinglehurst, Deborah; Queen Mary University of London, Institute of Population Health Sciences |
| Keywords:                     | PRIMARY CARE, QUALITATIVE RESEARCH, Quality in health care < HEALTH SERVICES ADMINISTRATION & MANAGEMENT                                                                                  |
|                               |                                                                                                                                                                                           |

SCHOLARONE™  
Manuscripts

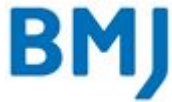

I, the Submitting Author has the right to grant and does grant on behalf of all authors of the Work (as defined in the below author licence), an exclusive licence and/or a non-exclusive licence for contributions from authors who are: i) UK Crown employees; ii) where BMJ has agreed a CC-BY licence shall apply, and/or iii) in accordance with the terms applicable for US Federal Government officers or employees acting as part of their official duties; on a worldwide, perpetual, irrevocable, royalty-free basis to BMJ Publishing Group Ltd ("BMJ") its licensees and where the relevant Journal is co-owned by BMJ to the co-owners of the Journal, to publish the Work in this journal and any other BMJ products and to exploit all rights, as set out in our [licence](#).

The Submitting Author accepts and understands that any supply made under these terms is made by BMJ to the Submitting Author unless you are acting as an employee on behalf of your employer or a postgraduate student of an affiliated institution which is paying any applicable article publishing charge ("APC") for Open Access articles. Where the Submitting Author wishes to make the Work available on an Open Access basis (and intends to pay the relevant APC), the terms of reuse of such Open Access shall be governed by a Creative Commons licence – details of these licences and which [Creative Commons](#) licence will apply to this Work are set out in our licence referred to above.

Other than as permitted in any relevant BMJ Author's Self Archiving Policies, I confirm this Work has not been accepted for publication elsewhere, is not being considered for publication elsewhere and does not duplicate material already published. I confirm all authors consent to publication of this Work and authorise the granting of this licence.

1  
2  
3  
4 **Title of the article:** "It's all about patient safety": an ethnographic study of how pharmacy staff  
5 construct medicines safety in the context of polypharmacy.  
6  
7

8  
9 **Authors (full name, department, institution, city and country of all co-authors):**

10  
11 Nina Fudge BA (Hons), MSc, PhD, FHEA  
12 Institute of Population Health Sciences  
13 Barts and The London School of Medicine and Dentistry  
14 Queen Mary University of London  
15 London, UK  
16

17  
18 Deborah Swinglehurst MBBS MA MSc PhD FHEA FRCGP  
19 Institute of Population Health Sciences  
20 School of Medicine and Dentistry  
21 Queen Mary University of London  
22 London, UK  
23  
24

25  
26 **Corresponding author:**

27  
28 Deborah Swinglehurst  
29 Institute of Population Health Sciences  
30 School of Medicine and Dentistry  
31 Queen Mary University of London  
32 London, UK  
33  
34

35  
36 Email: d.swinglehurst@qmul.ac.uk  
37  
38  
39  
40  
41

42 **Word count 4,759 (excluding title page, abstract, article summary, references, and tables)**  
43  
44  
45  
46  
47  
48  
49  
50  
51  
52  
53  
54  
55  
56  
57  
58  
59  
60

**ABSTRACT**

**Objective:** As polypharmacy increases, so does the complexity of prescribing, dispensing and consuming medicines. Medication safety is typically framed as the avoidance of harm, achievable through adherence to formal policies and guidelines and attention to operational issues. Automation, robotics and technologies are positioned as key players in the elimination of medication error in the face of escalating demand, despite limited research on how these innovations are taken up, used and adapted in practice. We explore how 'safety' is constructed and accomplished in community pharmacies in the context of polypharmacy.

**Design and setting:** In-depth ethnographic case study across four community pharmacies in England. Data collection entailed 140 hours participant observation and 19 in-depth interviews. Practice theory informed the analysis.

**Participants:** 33 pharmacy staff (counter staff, technicians, dispensers, pharmacists).

**Results:** In their working practices related to polypharmacy, staff used the term 'safety' in explanations of why and how they were doing things in particular ways. We present three interlinked analytic themes within an overarching narrative of care: caring for the technology; caring for each other; and caring for the patient. Our study revealed a paradox: polypharmacy was visible, pervasive and productive of numerous routines, yet was rarely discussed as a safety concern per se. Safety meant ensuring medicines were dispensed as prescribed, and correcting errors pertaining to individual drugs through the clinical check. Pharmacy staff did not actively challenge polypharmacy, even when the volume of medicines dispensed might indicate 'high risk', locating the responsibility for polypharmacy with prescribers.

1  
2  
3 **Conclusion:** 'Safety' in the performance of practices relating to polypharmacy was not a fixed,  
4 defined notion, but an ongoing, collaborative accomplishment, emerging within an  
5 organisational narrative of 'care'. Despite meticulous attention to 'safety', carefully guarded  
6 professional boundaries meant that addressing polypharmacy *per se* in the context of  
7 community pharmacy was beyond reach.  
8  
9  
10  
11  
12  
13  
14  
15  
16

### 17 **ARTICLE SUMMARY - Strengths and limitation of this study:**

- 18  
19 
- 20 • Adopts an ethnographic approach, observing the detailed practices of pharmacy staff  
21 'doing safety' in the particular context in which it happens, rather than relying on  
22 interview accounts alone.
  - 23  
24
  - 25 • Two researchers were involved in the observations, interviews and analysis, allowing  
26 different professional experiences and perspectives to inform the analysis, enhancing  
27 the study's credibility.
  - 28  
29
  - 30 • Some aspects of the setting were not accessible to the researchers e.g. management  
31 decisions about 'running the business' of a community pharmacy.
  - 32  
33
  - 34 • Our findings may not translate readily outside the context of independent community  
35 pharmacies, but our interpretations offer useful ways of conceptualising safety across  
36 UK and international settings.  
37  
38  
39
- 40  
41 
- 42  
43  
44  
45  
46  
47  
48  
49  
50  
51  
52  
53  
54  
55  
56  
57  
58  
59  
60

## INTRODUCTION

Safety in prescribing, dispensing, and administering medicines is a global public health priority.<sup>1-5</sup> The World Health Organisation defines medicines safety as ‘protect[ing] patients from harm while maximizing the benefits from medication’.<sup>6</sup> Efforts to address medicines safety have traditionally targeted secondary care. Attention is now turning to primary care settings where a growing population of older people with multimorbidity, escalating prescribing and polypharmacy drive a greater burden of iatrogenic harm.<sup>6-10</sup> Community pharmacies provide a key role within medicines management in primary care, integrating multiple tasks related to medication (including but not limited to dispensing and delivering prescriptions, dispensing medicines through medication compliance aids (MCAs), and counselling patients through medication use reviews) with the need to operate as viable commercial businesses.<sup>11</sup> This work has become increasingly challenging and complex due to polypharmacy, but how safety is enacted and produced in community pharmacy settings amidst this complexity remains poorly understood.<sup>12,13</sup>

Polypharmacy is usually defined as the concurrent use of five or more medications.<sup>6,14</sup> Differences in the way polypharmacy is defined and medication data is collected make international comparisons challenging, but a number of international studies demonstrate increased prescribing of multiple items in older populations.<sup>15</sup> The risks of polypharmacy are well documented, lying with both health care professionals and patients: medicine errors, adverse drug reactions, falls, frailty, hospital admission, increased hospital stay, and death.<sup>16,17</sup> In recognition that in some cases people may need multiple item prescriptions to treat their conditions, a distinction has been made between ‘appropriate’ polypharmacy or ‘problematic’ polypharmacy.<sup>18</sup>

Medication safety is typically framed as avoidance of error. Professional regulators and leadership bodies encourage reporting of errors, metrics for safe prescribing<sup>5</sup> and removal of inherent weaknesses in the system.<sup>6</sup> A more nuanced approach is now emerging, shifting the

1  
2  
3 focus from how errors are produced and avoided towards learning from observing usual  
4 practice, where – mostly – practice occurs error-free (a ‘Safety II’ approach).<sup>19</sup>  
5  
6  
7

8  
9 Previous work on safety in community pharmacies has presented safety culture as a product of  
10 managing the complex relationship between medicines-related workloads and maintaining  
11 commercial viability.<sup>20</sup> While safety improvement may be enabled by managers and  
12 institutional policies, it is *enacted* by frontline staff and therefore evolves as a result of this  
13 enactment.<sup>11</sup> One study, based on interview data, has suggested that implementation of  
14 procedures is subject to an interplay between *procedures-as-imagined* and *procedures-as-done*  
15 (Thomas 2015; Wears 2015).<sup>21,22</sup> Adopting the term ‘organisational resilience’, Thomas *et al* call  
16 for further research to investigate *how* organisational culture contributes to decision making  
17 and action around implementation of standardised procedures.<sup>21</sup>  
18  
19  
20  
21  
22  
23  
24  
25  
26

27 We are adopting a Safety II orientation to our study of polypharmacy,<sup>23,24</sup> conducting  
28 ethnographic and participatory research across primary care settings (patients’ homes, general  
29 practice, community pharmacy), seeking to generate ‘practice-based evidence’.<sup>25</sup> This  
30 complements normative understandings of evidence-based practice which position  
31 practitioners as ‘empty vessels’ at one end of the research-into-practice pipeline, waiting to be  
32 filled with evidence-based guidelines.<sup>26</sup> We address the research question: How is patient  
33 safety constructed in community pharmacy settings in the context of polypharmacy?  
34  
35  
36  
37  
38  
39  
40

## 41 **METHODS**

### 42 **Setting**

43  
44  
45  
46  
47  
48  
49  
50  
51  
52  
53  
54  
55  
56  
57  
58  
59  
60



1  
2  
3 This study was part of an in-depth, multi-site ethnographic study of polypharmacy in primary  
4 care (APOLLO-MM - protocol previously published<sup>23</sup>). We conducted an organisational  
5 ethnography of routines and practices in four English community pharmacies, pseudonymised  
6 Willow, Foxglove (part of Woodland Independent Pharmacy Group), Poppy and Lilac (part of  
7 Meadow Independent Pharmacy Group) (see table 1). Pharmacies were recruited along with GP  
8 practices to form contrasting research clusters. Each cluster (GP + pharmacies) provide  
9 medicine services to our patient participants in the wider APOLLO-MM study.<sup>23</sup>  
10  
11  
12  
13  
14  
15  
16  
17  
18  
19  
20  
21  
22  
23  
24  
25  
26  
27  
28  
29  
30  
31  
32  
33  
34  
35  
36  
37  
38  
39  
40  
41  
42  
43  
44  
45  
46  
47  
48  
49  
50  
51  
52  
53  
54  
55  
56  
57  
58  
59  
60

For peer review only

**Table 1: Characteristics of study pharmacies**

| Location                                                                 | Pharmacy | Index of multiple deprivation 2019 <sup>§</sup> | Number of staff                                                                                           |                                                                                    |
|--------------------------------------------------------------------------|----------|-------------------------------------------------|-----------------------------------------------------------------------------------------------------------|------------------------------------------------------------------------------------|
| Woodland Independent pharmacy group (3 pharmacies)<br><br>Urban setting  | Willow   | 30% most deprived LSOA*                         | 2 pharmacists<br>1 trainee pharmacist<br>8 dispensers/technicians<br>2 counter staff<br>1 delivery driver | Group pharmacist owners (n=2) who oversee pharmacies and cover staff when needed.  |
|                                                                          | Foxglove | 50% most deprived LSOA                          | 2 pharmacists<br>2 counter staff<br>8 dispensers/technicians                                              |                                                                                    |
| Meadow independent pharmacy group (5 pharmacies)<br><br>Suburban setting | Poppy    | 20% least deprived LSOA                         | 1 pharmacist<br>2 dispensers<br>1 Part-time counter staff<br>1 delivery driver                            | Group pharmacist owner (n=1) who oversees pharmacies and covers staff when needed. |
|                                                                          | Lilac    | 50% least deprived LSOA                         | 1 pharmacist<br>1 dispenser<br>2 dispensers/counter staff<br>1 delivery driver                            |                                                                                    |

§ <https://www.gov.uk/guidance/english-indices-of-deprivation-2019-mapping-resources#indices-of-deprivation-2019-explorer-postcode-mapper>

\*LSOA, Layer Super Output Area or Neighbourhood

Two researchers (NF, a social anthropologist and DS, an academic GP, both experienced ethnographers) undertook data collection and analysis. Data included: ethnographic observations; shadowing staff, inviting them to “talk me through what you are doing”; formal interviews; documents (e.g. standard operating procedures, dosette checklists, to do lists, identified as relevant through our observations and interviews). We conducted 140 hours observation (December 2017 – January 2018; December 2018 – February 2019, March – July 2019), focusing on everyday routines and practices concerning polypharmacy and the management of patients with multimorbidity. This work occurred primarily in ‘backstage’

regions of the pharmacies,<sup>27</sup> such as dispensaries and areas designated for preparation of multi-compartment compliance aids (MCCAs) – known as ‘dosettes’ at all sites.

We used one-to-one briefing sessions, posters, and information leaflets to ensure informed consent from pharmacy staff. We adopted a ‘processual consent’ approach, revisiting consent iteratively before each occasion of observation.<sup>28</sup>

We conducted 19 formal interviews with 21 key pharmacy staff identified through ethnographic observations (including one group interview) (see table 2). Interviewees signed consent forms in advance. We adopted a narrative approach, using a broad topic guide, inviting in-depth accounts of working practices (Supplement 1). We asked participants to attend the interview prepared to share a story relating to polypharmacy. Interviews lasted 14 - 59 minutes, were audio-recorded and transcribed verbatim.

**Table 2: Pharmacy interviews**

| Pharmacy | Pharmacist/pharmacy group owner | Pharmacist | Pharmacy technician | Dispenser | Counter staff | Total |
|----------|---------------------------------|------------|---------------------|-----------|---------------|-------|
| Willow   | 1                               | 2          | 3                   | 3         |               | 9     |
| Foxglove |                                 | 2          | 1                   | 4         |               | 7     |
| Poppy    | 1                               | 1          |                     | 1         |               | 3     |
| Lilac    |                                 |            |                     | 1         | 1             | 2     |

### Data analysis

The dataset comprised 280 pages of typed fieldnotes, 279 pages of transcribed interviews, and 46 documents. Fieldnotes were typed after observations/interviews (usually within 24 hours), incorporating reflections and theoretical insights, then shared between NF and DS to prompt further critical reflection guided by our different fieldwork experiences and disciplinary orientations. This informed subsequent fieldwork, and ensured a coherent approach to data gathering. We kept a digital, reflective journal using Evernote®, sharing memos, observations and theoretical insights relevant to the wider polypharmacy project. We used QSR NVivo 12

1  
2  
3 qualitative data analysis software for data management.<sup>29</sup> The data we present is anonymised;  
4 names given for interviewees and other staff members are pseudonyms.  
5  
6  
7

8  
9 The analysis was inductive, with 'safety' emerging early in our analysis as an organising frame  
10 for the work of repeat dispensing for patients experiencing polypharmacy. We directed our  
11 analysis to the tasks and routines staff undertook, how these constituted notions of patient  
12 safety, and how staff accomplished safety-in-practice.<sup>19</sup> Informed by practice theory, we  
13 focused on interconnections between people, artefacts, spaces and technologies. Under this  
14 lens, organisations are conceptualised as 'bundles of practices' and management is an activity  
15 aimed at ensuring that social and material activities work more-or-less in alignment.<sup>30,31</sup>  
16  
17  
18  
19  
20  
21  
22

### 23 **Patient and public involvement**

24 We have a project advisory group of 11 members including academics, health professionals,  
25 representation from Age UK, two patient members and a lay chair. Patients have been involved  
26 in the proposal development, design of participant materials and project website  
27 (www.polypharmacy.org.uk), our application for ethical approval, the project launch event,  
28 piloting of interviews, study design and conduct. We have an online patient panel of five  
29 members.  
30  
31  
32  
33  
34  
35  
36  
37

### 38 **RESULTS**

39 'Safety' was a collective concern in all pharmacies. Staff used the term 'safety' in explanations  
40 of how and why they did certain things: picking medicines from shelves in a particular order;  
41 asking patients for names and addresses; switching tasks regularly. In naturalistic talk, staff did  
42 not articulate what constitutes 'safety', but in interviews they referred to safety as 'the right  
43 drug, the right patient, the right time'.  
44  
45  
46  
47  
48  
49  
50  
51  
52  
53  
54  
55  
56  
57  
58  
59  
60

1  
2  
3 The pharmacies used various technologies (e.g. robots, MCCAs, spreadsheets, computers,  
4 telephones, printouts, labels, post-it notes) in the process of dispensing (see table 3). Willow  
5 has two robots which automate in-house dispensing and MCCA production, acting as a 'dosette  
6 production hub' for all the Woodland pharmacies. Poppy and Lilac had considered automating  
7 dosette production but reported it was not financially viable.  
8  
9  
10  
11  
12  
13  
14  
15  
16  
17  
18  
19  
20  
21  
22  
23  
24  
25  
26  
27  
28  
29  
30  
31  
32  
33  
34  
35  
36  
37  
38  
39  
40  
41  
42  
43  
44  
45  
46  
47  
48  
49  
50  
51  
52  
53  
54  
55  
56  
57  
58  
59  
60

**Table 3: ethnographic 'thick description' of the pharmacies** <sup>32</sup>

### Woodland Independent Pharmacy Group

**Willow** pharmacy, housed in purpose-built premises, has a small footprint given the volume of medicines it dispenses. Much of their work comes from the GP surgery over the road. Every bit of space is taken up with stores of medicines: small boxes of pills in blister packs on shelves from counter to ceiling; large canisters of barrier creams, syrups and fortified milkshakes on lower shelves below the counters; robot-prepared dosette boxes stacked in floor-to-ceiling shelves. Delivery men visit twice daily, trolleys laden with large cardboard boxes full of medicines that are unpacked, cross-checked off the order sheet and stacked on the shelves as quickly as they are removed. At regular intervals, the low hubbub of dispensing and dosette box production work is punctuated by a woman at the front counter calling out 'Prescription waiting!' as she clips the prescription on a tiny metal hanger at the front of the dispensary. The low whooshing noise from the dispensing robot signals drugs ready for a technician and pharmacist to check, bag up and pass to a customer. All 10-15 staff move quickly around the space as they gather up medicines, stack the shelves, deblisten tablets to replenish the hungry robots, add a reminder to the whiteboard or post-it note, respond to customers - switching seamlessly between languages as needed. They skillfully navigate the tight space, shifting boxes, climbing steps, passing medicines from one to the other and always listening out for each other.

**Foxglove**, sister pharmacy of Willow, has an even smaller footprint than Willow. It's housed in a converted Victorian building, within a row of shops with flats above. Entering the pharmacy through an automatic sliding door signals the shop has recently been modernized. A padded bench along one wall allows customers to sit while they wait. A selection of over-the-counter medicines is on display. The front counter is staffed by two people, handling patients who hand over their paper prescriptions or ask to pick up medicines. Counter staff flick through a card file to find a customer's prescription which cross-checks to a numbered shelf where medicines have been bagged up, waiting for patients to collect them. The dispensary is at the back with an eye-level counter, giving staff cover as well as a view of what's happening on the shop floor. The dosette area is hidden from customer view, even further back in this Tardis-like building and is particularly narrow. Here, a counter runs the length of one wall, which the 'dosette team' use to check the robot-produced dosettes (sent over from Willow) for errors before they are given to patients. Pharmacists tip and flick the dosette box from underneath to check and count the capsules and tablets in each cell. Floor to ceiling shelving runs around the room, storing each patient's four-weekly supply of dosettes, stored alphabetically by patient's surname and according to their collection or delivery day. As with Willow, there are on average 10 staff diligently working away, but always with an ear out to help one another.

### Meadow Independent Pharmacy Group

A steep slope marks the entrance to **Poppy** pharmacy, located opposite a GP practice, in a quiet, residential part of a suburban town. I wonder how some older customers navigate this entrance, but a sign on the door tells people to ask for help if needed. Each time the door opens a tune bleeps out, signalling the arrival or departure of a customer or delivery man. This immediately prompts someone to leave the dispensary which is in a raised area at the back of the shop, to leave their tasks, come forward and ask 'how can I help?' The shop floor houses an array of over-the-counter medicines and beauty items. It has a welcoming feel, with a row of chairs opposite the counter for customers waiting for prescriptions or just needing a seat. There are usually two or three people working in the shop at a time, in quiet dedication to their tasks. When there are no customers, staff focus on dispensing prescriptions, preparing baskets for filling dosettes, checking dispensed medicines, answering the phone, ordering medicines and receiving deliveries. Every available wall space is full of shelving to house medicines. Sticky, fluorescent yellow labels stuck to the shelves remind staff to 'select with care'.

**Lilac** pharmacy is in a parade of shops: a builder's trade shop, fish and chip shop, Co-op mini supermarket and a café in a suburban residential area. I am struck by a large sign plastered along the length of the front window 'FREE DELIVERY', similar to a sign on the glass shop front at Poppy. Inside it's very calm and quiet - the door opens onto a spacious, airy and light shop with shelves displaying all manner of over-the-counter medicines and beauty products, even children's toys. People frequently come in for a chat with the counter staff - often without even the excuse of a prescription to pick up. Despite the large shop floor, space behind the counter in the dispensary and dosette areas is tight - when I'm there, as with all the other pharmacies, I feel I am in the way although nobody seems to mind. I notice all the worktops are black, and Leena, the pharmacy manager, explains that all the pharmacies in the group are replacing their worktops with black ones. I am told that black worktops make the white tablets easier to see: when checking and counting tablets staff can simply lay the clear plastic dosette box on the worktop and easily see the number of pills in each cell. Compared to the Woodland group pharmacies, pace of work at the Meadow group pharmacies is less frenetic.

1  
2  
3 Preparation, storage and delivery of dosettes as a technology to support medicines-taking was  
4 a prominent working routine across both pharmacy groups, with demand growing despite  
5 reports questioning their safety.<sup>33,34</sup> Meadow Group's manager reported '*we are taking on*  
6 *extra work*' since larger, chain pharmacies were reducing this service. A handwritten poster at  
7 Willow showed dosette production increasing 10% from 252 to 278 patients over 7 months. All  
8 pharmacies used Electronic Prescribing Systems (EPS) to receive prescriptions from GPs and  
9 order prescriptions from GPs on patients' behalf.  
10  
11  
12  
13  
14  
15  
16

17 We present three interlinked themes which show how staff accomplish safety within an  
18 organisational narrative of care: caring for the technology; caring for each other; caring for the  
19 patient.  
20  
21  
22  
23

### 24 **Caring for the technology**

25  
26 Two technologies, dosette robots and EPS, illustrate how new routines and discourses emerge  
27 when technologies are introduced, and how 'traditional' technologies such as paper charts,  
28 post-it notes and whiteboards remain critical to the safety of medicines routines.  
29  
30  
31

32 Staff at Woodland pharmacies regularly described the dosette robot, and their work with it, as  
33 contributing to patient safety: '*Number one reason is patient safety*'; '*Everything is for patient*  
34 *safety*'; '*We got the robot for patient safety*'. This well-rehearsed collective narrative appealed  
35 to staff and drove the implementation and ongoing use of the robot, although staff were never  
36 explicit about what constitutes 'safety'. Their 'safety' statements resonate with claims on the  
37 robot manufacturer's website which report '*increased accuracy*' compared to the '*manual*  
38 *preparation method*' enabling '*the pharmacy to greatly increase safety*'. The website also  
39 boasts that dosettes are '*proven to boost adherence rates from 61% to 97%*', and that the robot  
40 offers '*competitive advantage*' through '*lower production costs*', '*increase in production speed*',  
41 and a '*significant decrease in labour costs*'.<sup>35,36</sup> The presumed economic benefits were invisible  
42 to us; staff did not express any connection between robot and revenue.  
43  
44  
45  
46  
47  
48  
49  
50  
51  
52  
53  
54  
55  
56  
57  
58  
59  
60

1  
2  
3 Automation of dosette production has not eliminated the need for human care. The robot is  
4 never left alone when *'in production'* (i.e. filling dosette cells). It has generated new scope for  
5 errors and new working routines to address errors. For example, staff must constantly  
6 *'replenish'* the robot's 400 translucent blue containers; drugs in underfilled containers are  
7 beyond the reach of the robot's suction arm which lifts drugs one-by-one into the programmed  
8 dosette cells. This requires technical knowledge about a drug's stability and sophisticated local  
9 knowledge about how fast the lines are – *'slow lines'* demand less frequent attention than *'fast*  
10 *lines'*. The *'replenishing'* process involves staff *'deblistering'* tablets or capsules from their  
11 packaging by feeding blister packs through a deblistering machine, depositing tablets into  
12 shallow plastic trays for labelling by drug name, batch number, description, and number of  
13 tablets. A co-worker pours the tablets into the matched robot container, first selecting the  
14 correct container lid - with holes just big enough to enable the suction mechanism to pick out a  
15 single tablet for each cell. After filling, staff do manual checks to ensure the dosette contains  
16 the right number of items per cell and that pills have not accidentally *'jumped'* from cell to cell as  
17 sometimes happens. Certain medicines (*'externals'*) are not kept in the robot; they may have  
18 limited shelf life after deblistering or be *'slow lines'*. Staff add these manually once the robot  
19 has completed a patient's four-week set.  
20  
21  
22  
23  
24  
25  
26  
27  
28  
29  
30  
31  
32  
33  
34

35 The pharmacy has protocols and standard operating procedures but when we enquire of their  
36 whereabouts the manager says they are *'locked in a cupboard in the staff room.'* Probing  
37 further we discover that although the robot was installed over two years ago they are *'still*  
38 *working'* on their protocol for dosette production which *'changes all the time'*. The pharmacy  
39 manager continues *'we are so busy and demand is increasing. When we reach the pinnacle we*  
40 *will write something. I usually just ask the staff and they tell me what's the best way'* (Fieldnote,  
41 Willow, 09/01/2018, DS). His quote illustrates the importance of local knowledge, grounded in  
42 practice, and how this becomes constructed through informal communication rather than  
43 formal protocol.  
44  
45  
46  
47  
48  
49  
50  
51  
52  
53  
54  
55  
56  
57  
58  
59  
60



1  
2  
3 EPS is central to dispensing routines, but pharmacy staff adopted a range of workarounds to  
4 ensure safety that developers of the EPS system may not have envisaged. It was striking that  
5 across all pharmacies *all* prescriptions sent electronically by GPs (via the NHS 'spine') were  
6 printed. The working day was punctuated at c.15 minute intervals by staff '*refreshing*' the EPS  
7 screen to view and print new scripts, a routine they considered essential to safe working  
8 practice. Only paper had sufficient 'ecological flexibility'<sup>37</sup> to enable swift movement of the  
9 prescription around different physical spaces in ways which supported their collaborative  
10 working – the same paper prescription passed from person-to-person moving in and out of  
11 different working routines. Its materiality was important, serving as a handy checklist for  
12 picking medicines off the shelves, checking medicines before '*bagging up*', and handing the  
13 '*right medicines to the right patients*' (see table 4). Jimi, Woodland's manager, explained that  
14 portable electronic devices would not do the job; they have no access to a secure wireless  
15 internet connection. Given his innovation with robot technologies, we interpret this not as  
16 resistance to technology *per se*, rather an expression that the technology is insufficiently  
17 flexible for tasks required.<sup>37,38</sup>  
18  
19  
20  
21  
22  
23  
24  
25  
26  
27  
28  
29  
30  
31  
32  
33  
34  
35  
36  
37  
38  
39  
40  
41  
42  
43  
44  
45  
46  
47  
48  
49  
50  
51  
52  
53  
54  
55  
56  
57  
58  
59  
60

Table 4: Electronic prescribing routines

| Routines involving the printed copy of the electronic prescription                                                                                                                                                                                                                                                                                      | Examples from fieldnotes and interviews                                                                                                                                                                                                                                                                                                                                                                                                                                                                                                                                                                                                                                                                                                                                                                                                                                                                                                                                                                                                                                                                                                                                                                                                                                                                                                                                                                                                                                                                                                                                                                                                                                                                                                                                                                                                                                                                                                                                                                                                                                                                                                                                                                                                                                                 |
|---------------------------------------------------------------------------------------------------------------------------------------------------------------------------------------------------------------------------------------------------------------------------------------------------------------------------------------------------------|-----------------------------------------------------------------------------------------------------------------------------------------------------------------------------------------------------------------------------------------------------------------------------------------------------------------------------------------------------------------------------------------------------------------------------------------------------------------------------------------------------------------------------------------------------------------------------------------------------------------------------------------------------------------------------------------------------------------------------------------------------------------------------------------------------------------------------------------------------------------------------------------------------------------------------------------------------------------------------------------------------------------------------------------------------------------------------------------------------------------------------------------------------------------------------------------------------------------------------------------------------------------------------------------------------------------------------------------------------------------------------------------------------------------------------------------------------------------------------------------------------------------------------------------------------------------------------------------------------------------------------------------------------------------------------------------------------------------------------------------------------------------------------------------------------------------------------------------------------------------------------------------------------------------------------------------------------------------------------------------------------------------------------------------------------------------------------------------------------------------------------------------------------------------------------------------------------------------------------------------------------------------------------------------|
| <p>Refreshing the screen, printing out newly arrived prescriptions, leafing through the printouts to organise the workflows and routines:</p> <ul style="list-style-type: none"> <li>• Does everything look in order?</li> <li>• Any obvious anomalies?</li> <li>• Anything urgent?</li> <li>• Anything need to be ordered for the next day?</li> </ul> | <p>When he's not serving at the counter, Mahendra, the pharmacist, is at the dispensary computer dealing with prescriptions. He has refreshed the screen and printed out a batch of prescriptions. As he processes each prescription on the computer, he puts the paper prescription in a red plastic basket with labels which he's also printed out: a bag label and a label for each medicine prescribed. At this point he may also order any medicines needed. He stacks prepared baskets on top of each other. This pile of baskets waits for a dispenser to take a basket, pick and select the required drugs, before handing back to Mahendra to do the final check and bag up the medicines. (Fieldnote, Poppy, 25/03/2019, NF)</p> <p>With a pile of freshly printed out prescriptions, Sameer, the pharmacist, explains that you can't just sort them by patient and put them in the basket for the dispensers to start processing, because there might be urgent ones that need to be processed straight away. Instead, you <i>'have to sift through to see what is important.'</i> After visually scanning and each prescription, he has identified three prescriptions which processing first. One is for a rescue pack for a COPD patient; an acute situation as the patient will want the drugs today. Another acute case - a urine infection. The third one is for meal replacement drinks. These will need to be ordered today so the patient can get them tomorrow. Sameer continues with his explanation <i>'so I put these ones [the thicker pile of the recently printed prescriptions] behind this lot [a pile of prescriptions already in the grey basket] because they came through last and then I put these three [the urgent ones] on top because they are important.'</i> (Fieldnote, Willow, 09/01/2019, NF)</p> <p>Shabnam is now going through the pile of recently printed electronic prescriptions. She is sorting through them at speed and putting certain ones to one side. She explains that she <i>'tries to take out the bigger ones, leave the easier ones for the others to do 'cos I'm more experienced'</i> and they can do the easier ones in between dealing with <i>'waitings or collections'</i>. (Fieldnote, Willow, 10/01/2019, NF)</p> |
| <p>Paper prescriptions can easily move about the pharmacy and be transferred from one member of staff to another to complete a dispensing routine</p>                                                                                                                                                                                                   | <p>Mo took a small yellow card marked <i>'Willow pharmacy'</i> at the top of which was a sticker with a patient's name and address details. He looked in the black filing cabinet under the relevant patient's surname, pulled out a prescription then put a box of multivitamin tablets and the prescription into a small, red, plastic basket. He went to the front counter and I heard him explain that <i>'there is only one'</i>. He then returned to the black filing cabinet, found another green prescription marked <i>'repeat dispensing'</i> and made up another small red basket containing the script and a box of emollient, and took this to the front counter. Linda took over, taking hold of the basket. Mo moved quickly round the corner to dispense some methadone in the supervision corner. I realise I am once again a bit perplexed about this apparently simple transaction - and am yet to fully grasp the path of prescriptions around this front counter area. The problem is that it is so fast moving and the routines are so tacit and collectively embodied that nothing much is said and opportunity to ask them to explain is limited by the frenetic nature of the environment. I wonder how Nina is managing with this as clearly we do need to grasp the path of a prescription request from the front counter to the dispensing of medicines. Mo had disappeared and I had lost my <i>'shadowee'</i>...</p>                                                                                                                                                                                                                                                                                                                                                                                                                                                                                                                                                                                                                                                                                                                                                                                                                                      |

|                                                                                                                                                                                                                                 |                                                                                                                                                                                                                                                                                                                                                                                                                                                                                                                                                                                                                                                                                                                                                                                                                                                                                                                                                                                                                                                                                                                                                                                                                                                                                                                                                                                                                                                                                                                                                                                                                                                                                                                                                                                                                                                                                                                                                                                                                                                                                                                                                                                                                                                                                                                                                   |
|---------------------------------------------------------------------------------------------------------------------------------------------------------------------------------------------------------------------------------|---------------------------------------------------------------------------------------------------------------------------------------------------------------------------------------------------------------------------------------------------------------------------------------------------------------------------------------------------------------------------------------------------------------------------------------------------------------------------------------------------------------------------------------------------------------------------------------------------------------------------------------------------------------------------------------------------------------------------------------------------------------------------------------------------------------------------------------------------------------------------------------------------------------------------------------------------------------------------------------------------------------------------------------------------------------------------------------------------------------------------------------------------------------------------------------------------------------------------------------------------------------------------------------------------------------------------------------------------------------------------------------------------------------------------------------------------------------------------------------------------------------------------------------------------------------------------------------------------------------------------------------------------------------------------------------------------------------------------------------------------------------------------------------------------------------------------------------------------------------------------------------------------------------------------------------------------------------------------------------------------------------------------------------------------------------------------------------------------------------------------------------------------------------------------------------------------------------------------------------------------------------------------------------------------------------------------------------------------|
|                                                                                                                                                                                                                                 | <p>(Fieldnote, Willow, 03/01/2018, DS)</p> <p>Mo hands a prescription over to Rashida part way through its preparation asking her to <i>'take over please'</i> - a quiet negotiation met with no resistance and a seamless transfer of a task part way through. Mo says to Ali, who's recently arrived for his shift, <i>'we need to check the orders'</i>. Ali lifts up a heavy crate of medicines from the floor and they both go to the back of the pharmacy.</p> <p>(Fieldnote, Willow, 03/01/2018, DS)</p>                                                                                                                                                                                                                                                                                                                                                                                                                                                                                                                                                                                                                                                                                                                                                                                                                                                                                                                                                                                                                                                                                                                                                                                                                                                                                                                                                                                                                                                                                                                                                                                                                                                                                                                                                                                                                                   |
| <p>Prescriptions filed for collection act as a record to check the right patient has the right drug</p>                                                                                                                         | <p>All four pharmacies implemented similar process for patients to pick up their medicines. This description from Foxglove denotes how it's done:</p> <p>After checking the medicines in the basket with the medicines listed on the prescription, Zane, the pharmacist bags up the medicines and seals the bag with a pharmacy bag label. The prescription is put in a white plastic basket that will go through to the front counter for filing alphabetically by patient's surname in a drawer under the counter. When a patient comes in to pick up a prescription the staff search through this filing system for the prescription. Aiza tells me the most important thing to check is the patient's address: <i>'so many patients here have the same name.'</i> Sameer, at Willow also echoed this point: there are so many people with the same name at the pharmacy that staff <i>'can't go on name. I don't care if [a patient] can't speak English. If you can't say your address you won't get your prescription.'</i> He draws my attention to the reminder notes stuck to the collection drawers instructing staff to search on address first and to match the bagged up drugs to the prescription.</p> <p>(Fieldnote, Foxglove and Willow, 10/01/2019, 16/01/2019 &amp; 24/01/19, NF)</p>                                                                                                                                                                                                                                                                                                                                                                                                                                                                                                                                                                                                                                                                                                                                                                                                                                                                                                                                                                                                                                           |
| <p>Storing prescriptions with the <i>'card'</i> or the <i>'map'</i> which denotes the medicines for the dosette patients. The prescription becomes part of the checking process alongside the CARD/MAP and the dosette box.</p> | <p>Anjali, a pharmacist, takes me through the dosette checking process. She starts with the MAP - a paper record of which drugs the patient is on and at which time points during the day they should be taken. She reiterates that <i>'if any changes happen, changes must be noted down on the MAP by hand.'</i> The next thing is to check the prescription with the MAP, but <i>'the MAP is gospel'</i>. Anjali explains the next step is to <i>'go down the MAP and tick off on the prescription if the drugs are on the MAP. It's also a double check on the labelling process.'</i> While I'm doing this, says Anjali, I also check on the doses etc. Once these checks have been done, Anjali puts the prescription away in the basket that belongs to the patient whose dosette she is checking, before she can begin to check the capsules and tablets in the dosette box.</p> <p>(Fieldnote, Lilac, 14/03/2019, NF)</p> <p>There were two people working in the dosette area on my arrival – Saleem, the second pharmacist on 'checking' and Nadira, an apprentice technician. Saleem inspects a dosette, flicking his finger underneath to make the tablets jump and rotating it at various angles to inspect inside the individual cells. He then signs line by line against each medication on the printed lists stuck into the dosette box cover. This one had <i>'no complications.'</i> The dosette area is a narrow rectangular room with counter down the left hand side as you enter from the dispensary. Saleem is on the right hand side of the room, standing up and perched behind a stack of green crates all containing dosettes that need checking. Saleem tells me that he first checks the prescription against the <i>'card'</i> (a plastic wallet containing a printed Word document with the patient's name, medicines, medication review date). This is also stored in electronic form on the computer. Having established that the card and the prescription are the same, he then checks the contents of the dosette box. He explains that the dosette box, the card and the prescription need to agree with each other. My sense is that <i>'the card'</i> is the working or master document in guiding their practices around checking and making up the boxes.</p> <p>(Fieldnote, Lilac, 05/11/2018 DS)</p> |

### Caring for each other

Caring for each other encompasses a number of practices to ensure safe working as a team. Members of staff were always alert, always listening and ready to take initiative. Staff were able to report errors without fear of negative consequences and we experienced a strong commitment to social cohesion.

Throughout our fieldwork we observed staff diligently pursuing their individual tasks but always poised and available to help a colleague e.g. find a drug, check/sign-off a prescription, move to the dispensary to serve a growing queue of patients, replenish the robot:

*Caleb, a technician, arrived at work and mumbled something. Rohima turned to him and said "she's gonna have to call back in half an hour for dosette box issues". I realised I had no idea which question she was responding to, or where it had come from. There is such a strong sense in this workplace of people being on the alert to subtle cues from colleagues around the site and I realise I am not always 'tuned in' and wonder at what seems like an 'extra sense' operating between its members to keep things flowing.*

(Fieldnote, Willow, 03/01/2018, DS)

We often witnessed staff huddled together to solve a problem, with junior staff encouraged to offer solutions, define processes or suggest procedural changes:

*Caleb who has been in 'production' appears and strikes up a conversation with Jimi, the pharmacy owner - a discussion about Epilim [sodium valproate] 100 and 200 and stability issues. Caleb suggests that as they use so much of these items in one production run he wonders if they could change its status from 'external' to 'production'. Jimi considers it and answers back "if we only filled it once at production, turnover is high." Mo, the pharmacist comes over and joins in, suggesting they ask someone. Jimi suggests that Caleb phone Sanofi, the drug company, to ask how long the tablets can remain out of the packets.*

(Fieldnote 09/01/2018, Willow pharmacy, DS)

1  
2  
3 'Externals' add considerable extra work to dosette production as they are dealt with manually,  
4 but this exchange also highlights how notions of 'safety' incorporate understandings of supply  
5 and demand, drug-related storage and stability, alongside a welcoming of ideas by senior staff.  
6  
7  
8

9  
10 We also observed open discussion as challenges arise, with junior members of staff taking the  
11 initiative to come up with solutions or refine working routines based on their knowledge and  
12 expertise:  
13

14  
15  
16   
17 *Jimi addressed a small group of staff, reflecting on a recent 'deblistering problem' when*  
18 *more than one brand of pill ended up in the same container. He told them to "be alert"*  
19 *and made some suggestions for avoiding this in future, acknowledging how difficult it is*  
20 *amidst a "sea of gliclazide".*  
21  
22  
23

24  
25 *A few days later, Laila (dispenser responsible for dosettes) spends her lunch break*  
26 *creating a 'deblistering SOP'. With three steps typed up, she asks Saleem, a pharmacist,*  
27 *what step four should be, adding "I can't believe this – it is like the easiest thing we do"*  
28 *By the end of the lunch break she has five steps: "I will show it to Sameer and Caleb...this*  
29 *is what we do".*  
30  
31  
32  
33

34  
35 *I was struck by the bottom-up, collaborative nature of this exercise. Safety was being*  
36 *worked out on the hoof with everyone included, acknowledgement of its complexity and*  
37 *overall, a sense of commitment and fun. But the formalisation of this into a document*  
38 *seemed at odds with their usual approach of just asking each other.*  
39  
40  
41  
42

43  
44 *I learn a few days later that the SOP is now an A4 sheet with 12 bullet points stuck on*  
45 *the wall of which Laila is clearly proud. Nina watched Laila stage a quiz in which she*  
46 *tested Linda's knowledge, with Naihra joking from the sidelines. It is imperfect in its*  
47 *detail, and appears incomplete.*  
48  
49  
50  
51

52  
53 *Nina asked "Why did you have to do a SOP...have you devised a new routine?"*  
54  
55  
56  
57  
58  
59  
60

1  
2  
3 *Laila “No, it was in our heads. Everyone knew, but it wasn’t written down”*

4  
5  
6 *Everyone was happy. The equilibrium was restored. The SOP is not so much an*  
7 *instruction of what to do but a reflection of what they now do, a product of teamwork*  
8 *and a consolidation of their collective knowledge.*

9  
10  
11  
12  
13 (Fieldnotes, Willow, 23/01/2018, DS)

14  
15  
16  
17  
18  
19 This care for one another created an environment which allowed staff to work collaboratively  
20 and openly resolve errors. At Willow and Foxglove in particular, staff were encouraged to  
21 identify and discuss errors which were regarded as an inevitable aspect of best practice:

22  
23  
24  
25  
26 *if you haven’t spotted any today, are you doing your job properly or are you asleep on*  
27 *the job, just letting things through? Errors keep you on your toes.*

28  
29  
30 (Interview, Pharmacist, Foxglove, 04/02/2019)

31  
32  
33 In Woodland pharmacies, the category of ‘error’ was noticeably broad and included:  
34 discrepancies arising when patient’s medication changed on hospital discharge; robot errors  
35 (e.g. broken tablets; tablets ‘jumping’ between cells). One consequence of this broad  
36 description that incorporated both ‘human’ and ‘technological’ error was that it made talk  
37 about errors commonplace, easy, collegiate and – importantly – actionable:

38  
39  
40  
41  
42  
43 *Aiza has grabbed one set of prescriptions belonging to one patient, or so it would seem.*  
44 *Quickly she has spotted an error and tells me “this is something you should see. There’s a*  
45 *mix up on names. Two patients with same surname but different addresses – someone*  
46 *has put both prescriptions together.” Aiza lays out the four prescriptions on the island*  
47 *worktop for me to see that indeed two belong to a ‘D’ and two belong to a ‘S’ but they*  
48 *have the same surname. She shows Raheem the error – “I almost made up one*  
49 *prescription for two people!” She does this in a matter of fact, upbeat way. There’s no*

1  
2  
3 *blame that it was someone else who put the prescriptions together initially. It's as if*  
4 *she's taken responsibility for almost making the error herself, had she not checked the*  
5 *names on the top of the prescription so carefully.*  
6  
7

8 (Fieldnote, Foxglove, 16/01/19, NF)  
9  
10  
11  
12  
13

#### 14 **Caring for the patient**

15  
16 Finally, safety emerges out a shared concern to care for patients; automation has not  
17 diminished relationships between staff and patients ("*we know our dosette patients*"). There  
18 are sticky notes and '*handover sheets*' on the dispensary walls acting as reminders of: '*dosette*  
19 *patients*' holidays/extra dosettes needed; hospital admissions; medication changes. Staff often  
20 made themselves available for dosette queries on their days off.  
21  
22  
23  
24  
25

26  
27 At Poppy, Marie, a dispenser, explained how she used her initiative to adapt their routine for  
28 labelling dosettes to accommodate a patient with too many medicines for one dosette (22  
29 morning; 17 midday; six teatime; 18 bedtime). Usually one inlay is placed in each dosette listing  
30 the medication it contains, its appearance and dose instructions. Marie explained 'we actually  
31 make two dosette boxes for her, because it doesn't all fit into [one] box. So she has her pain  
32 medications in one box, and in the other box she has the rest.' When Marie imagined how the  
33 dosette might be used beyond the pharmacy, she placed two inlays within each dosette, so  
34 each box listed the patient's full regimen:  
35  
36  
37  
38  
39  
40  
41  
42

43 *So if she ever went into hospital, say if she only grabbed one dosette box and she only*  
44 *took the pain one and they thought, oh, she's only on painkillers, and she didn't take the*  
45 *others (...) It will still have the whole list, so then they'll say to her, "Oh, where's your*  
46 *other medication because it's on this?" (...) Yeah, it dawned on me and she has to go*  
47 *back into hospital, and I don't know what it's like, if she's elderly and she's rushing, she*  
48  
49  
50  
51  
52  
53  
54  
55  
56  
57  
58  
59  
60

1  
2  
3 *might only pick up one dosette, and then what? The hospital aren't going to know what*  
4 *she's on.*

5  
6  
7 (Interview, Dispenser, Poppy, 29/09/2019)  
8  
9

10  
11 The following extract expresses the reciprocity and strength of staff-patient relationships which  
12 endure and surpass the role of automation:  
13  
14

15  
16  *Laila and Saleem are back from their surgery visits to pick up the daily prescriptions.*  
17 *Laila is full of chatter and excitement and has a story to tell. She says that she went into*  
18 *the surgery and it was so full, people everywhere and a really long queue. As she waited,*  
19 *a man, "whose dosette we make up" came up to her and "touched her feet, thanked her*  
20 *and said pray for me." The three of us talk about what this might mean. I asked Laila "is*  
21 *he grateful because you make up his dosettes?" "I don't know" she replied, "but I was so*  
22 *embarrassed. Everyone was watching me." Saleem asked if she was "anything to him,*  
23 *like an aunty?" "I'm nothing to him!" exclaimed Laila, "I'm just the girl in the pharmacy."*  
24  
25  
26  
27  
28  
29  
30  
31 (Fieldnote, Willow, 08/01/2018, NF)  
32  
33  
34  
35  
36  
37  
38  
39  
40  
41  
42  
43  
44  
45  
46  
47  
48  
49  
50  
51  
52  
53  
54  
55  
56  
57  
58  
59  
60



1  
2  
3 Several participants emphasised the importance of getting the right drug to the right patient at  
4 the right time as their top safety priority. Staff speculated on imaginary patients and future  
5 imagined scenarios by way of performing safety here-and-now, maintaining a rhetorically  
6 persuasive account of their high risk environment and embedding these future abstractions  
7 into material structures and systems in-house:<sup>39</sup>  
8  
9  
10  
11

12  
13 *You have to be accurate on what you do. Be prepared, because obviously you have to*  
14 *always double check what you do. It doesn't matter whichever job you do, and especially*  
15 *if you work in a pharmacy with medication, it's got to do with someone's life. As I said, if*  
16 *you give them something wrong, they could end up in hospital, they don't know where*  
17 *they're going to end up; they might die, or whatever!*  
18  
19

20  
21 (Interview, Dispenser, Foxglove, 04/02/2019)  
22  
23

24  
25 *Yes, my main worry is a mistake being made, so I have that at the top of my brain all the*  
26 *time. I'm constantly checking that everything is right, that it is the right meds, it's the*  
27 *right strength, you know the right tablet, every step. (...) Because I'd hate it. (...) like if it*  
28 *was my nan's meds or something like that and she said, "Oh, a mistake has been made*  
29 *and I've taken the wrong meds!" I wouldn't be very happy, I'd think, well, I think the*  
30 *whole point of the dosette box is to make sure that vulnerable people, like elderly or*  
31 *those who can't handle their meds, it's done for them in the correct way. (...) It is a*  
32 *constant worry, it's a lot of pressure.*  
33  
34  
35  
36  
37  
38  
39

40 (Interview, Dispenser, Lilac, 13/01/2020)  
41  
42

### 43 **Polypharmacy as a safety issue – whose responsibility?**

44  
45  
46  
47  
48  
49  
50  
51  
52  
53  
54  
55  
56  
57  
58  
59  
60

Our study revealed an important paradox. On the one hand, polypharmacy was visible, pervasive and productive of numerous working routines. On the other, polypharmacy *per se* was rarely discussed as a safety concern, either between pharmacy staff or between pharmacist and GP. Safety meant close attention to practices ensuring medicines were dispensed as prescribed, and correcting errors pertaining to individual drugs through the clinical check. It did not mean actively challenging polypharmacy *per se*, even in situations where the volume of prescribing (10+ or 15+ items) might indicate 'high risk'.

Table 5 illustrates the tension pharmacy staff articulate between dispensing 'safely' in the context of inherently risky lists of multiple medicines, from a professional position which distances them from the act of prescribing, the responsibility for which is firmly with the prescriber, usually the GP.

**Table 5: polypharmacy and safety**

| Tension pharmacy staff face between dispensing multiple medicines safely and ability to challenge instances of polypharmacy | Examples from fieldnotes and interviews                                                                                                                                                                                                                                                                                                                                                                                                                                                                                                                                                                                                                                                                                                                                                                                                                                                                                                                                                                                                                                                                                                                                                                                                           |
|-----------------------------------------------------------------------------------------------------------------------------|---------------------------------------------------------------------------------------------------------------------------------------------------------------------------------------------------------------------------------------------------------------------------------------------------------------------------------------------------------------------------------------------------------------------------------------------------------------------------------------------------------------------------------------------------------------------------------------------------------------------------------------------------------------------------------------------------------------------------------------------------------------------------------------------------------------------------------------------------------------------------------------------------------------------------------------------------------------------------------------------------------------------------------------------------------------------------------------------------------------------------------------------------------------------------------------------------------------------------------------------------|
| Clinical checks and the distancing of the pharmacy from polypharmacy as a safety concern                                    | When I ask Mo about checking the dosettes, he says this is a ' <i>clinical check and an accuracy check</i> '. When I ask what a clinical check is he tells me it is about looking for things like interactions between the meds and checking if a dose is too high for example. He goes on to explain that it might be ' <i>accurate but not safe!</i> ' Mo says that the checks will have been done in the last round (by which he means same patient, last month's round of dosettes) but that they check every round nevertheless. I cautiously ask about the fact that some patients are on very long lists of medicines - as this is something we are particularly interested in. He says that often there is a ' <i>primary</i> ' condition but that sometimes drugs cause side effects and this might lead to other prescriptions. Mo concedes this is difficult, and goes on to explain that the [pharmacy conducted] Medicine Use Reviews (MURs) are mainly about how and if the patient is <i>using</i> the meds... if there are adherence or side effects problems - but it's not a ' <i>full clinical</i> ' review about whether the drugs are working for example. He says that this is mainly the responsibility of the prescriber. |

|                                                                           |                                                                                                                                                                                                                                                                                                                                                                                                                                                                                                                                                                                                                                                                                                                                                 |
|---------------------------------------------------------------------------|-------------------------------------------------------------------------------------------------------------------------------------------------------------------------------------------------------------------------------------------------------------------------------------------------------------------------------------------------------------------------------------------------------------------------------------------------------------------------------------------------------------------------------------------------------------------------------------------------------------------------------------------------------------------------------------------------------------------------------------------------|
|                                                                           | <p>(Fieldnote Willow, 11/12/2018, DS)</p> <p>NF: Is it ever the pharmacist's role to talk to patients about stopping the medicines or ...?</p> <p>Zane: Sometimes ... well, we wouldn't initiate the stop here, no.</p> <p>NF: Right.</p> <p>Zane: If there's a stop, like for example, if a patient has been given an antibiotic, some of them interact with cholesterol medications, so you just need to let them know to stop taking that [cholesterol] medication for a week.</p> <p>NF: Like temporarily?</p> <p>Zane: Yeah, but it's just a temporary stop. We never say completely stop taking it, because ultimately that's the doctor's decision.</p> <p>(Interview, Pharmacist, Foxglove, 06/02/2019)</p>                             |
| <p>Polypharmacy as a norm but staff not in a position to challenge it</p> | <p>In this interview, Raheem recounted his shock of having to dispense a prescription of over 10 items of medication to a young child. NF asked him if he had the same sense of shock when he's making up a prescription of many items for an older person:</p> <p>Raheem: Yes, but it's not as much because - I know it sounds bad - but I'm a bit used to it here. And I seem more shocked when I see a 65 year old with less medication than usual.</p> <p>NF: Oh right</p> <p>Raheem: We actually had a lady that was around about 66 or something, she only took two medication and that just for pain maybe, and it was no diabetes, gastric or anything else, so I was shocked.</p> <p>(Interview, Technician, Foxglove, 04/02/2019)</p> |

## DISCUSSION

### Statement of principal findings

Our analysis illuminates the ongoing, collaborative work that constitutes safety across four community pharmacies. The end towards which this work is focused is 'safe' dispensing of medicines, broadly understood as 'right drug, right patient, right time'. The means by which this is achieved is a highly nuanced, ongoing process of organising and reorganising, negotiation and renegotiation. Safety is not fixed or inflexible – as might be assumed in a system standardised by protocols – but is in constant flux and open for adaptation by staff at all levels. From this perspective safety is a verb, not a noun.

Patient safety was not assured *because of* the implementation of technologies such as dispensing and dosette robots, dosettes or electronic prescribing, but emerged out of a shared concern by pharmacy staff to 'care'. Standard operating procedures did not drive action, but emerged out of collective action; the most useful ones were unfinished 'work-in-progress', flexible scripts that remained open to further adaptation. In addition to learning from errors, staff shared stories of caring for a collective imaginary – imagined scenarios of what *might happen* if medicines are not dispensed carefully and safely. The collective imaginary is rhetorically powerful, effective in sustaining staff orientation towards safety practices in an inherently risky context. Care is the glue that ensures patient safety and encompasses care for relevant technologies, care for each other and care for the patient. Following a Safety II approach, we have shown how pharmacy staff continuously adapt their routines to ensure 'as many things as possible go right' and that medicine safety can be assured 'to succeed under varying conditions'.<sup>19</sup> Sophisticated understandings of how the everyday actions of healthcare staff produce safety are essential as the organisational contexts within which healthcare is delivered become increasingly complex.

1  
2  
3 The absence of explicit talk about polypharmacy, or the relationships between polypharmacy  
4 and safety - even though we became known as the 'polypharmacy researchers' - surprised us.  
5  
6 This was not unique to pharmacies; we did not witness naturally occurring talk about  
7 polypharmacy in our study GP practices either. Whilst the pharmacists, technicians and  
8 dispensers worked hard to ensure 'safety' for their patients affected by polypharmacy, they did  
9 not consider they had any legitimate warrant to challenge it, and located the responsibility for  
10 the prevalence of polypharmacy with different parts of the health system, usually general  
11 practitioners.  
12  
13  
14  
15  
16  
17  
18

### 19 **Strengths and weakness of this study**

20 A key strength of our ethnographic approach was the opportunity to spend many hours  
21 observing the detailed practices of staff 'doing safety' in dispensing medicines in the particular  
22 context in which it happens, rather than relying on abstracted interview accounts alone.  
23  
24 Although our pharmacies varied in terms of the populations they served, all belonged to  
25 independent pharmacy groups (3-5 pharmacies in each group). Our findings may not translate  
26 readily to larger chain pharmacies, but our interpretations may offer useful ways of  
27 conceptualising safety across UK and international settings.  
28  
29  
30  
31  
32  
33

34 Not everything was easily visible to us as ethnographers. We did not have access to some  
35 aspects of pharmacy work, such as management decisions about 'running the business' of a  
36 community pharmacy, or the relationship between the financial and clinical dimensions of  
37 pharmacy work. This may have special relevance in polypharmacy in a health system such as  
38 the NHS where dispensing fees are paid to pharmacies on a 'per item' basis. Our study  
39 contributes to a body of qualitative research by foregrounding 'hidden work' and illuminating  
40 the creative 'tinkering', practical judgments and situated knowledge that is often missing from  
41 professional accounts and policy documents, but which is essential to ensuring technology  
42 assisted routines are safely implemented.<sup>13,40-43</sup> In contrast to previous work conducted in  
43 pharmacy settings our observations show that staff are adept at maintaining safe practices and  
44 resolving errors despite constraints such as limited space and interrupted work flows.<sup>44,45</sup>  
45  
46  
47  
48  
49  
50  
51  
52  
53  
54  
55  
56  
57  
58  
59  
60

### **The meaning of the study**

Our study sheds light on the often hidden work that pharmacy staff undertake in increasingly complex, high risk settings fueled by escalating prescribing. Whilst some policy literature acknowledges a need to help ‘practitioners manage workload related to polypharmacy in order to improve medication safety’,<sup>6</sup> we argue that policymakers could take greater account of practice ‘on the ground’ to inform guidelines by acknowledging how pharmacy professionals are currently working to ensure medication safety in high risk situations, such as those presented by polypharmacy. Furthermore, the policy literature focuses on distinguishing between appropriate and inappropriate polypharmacy. However, these are terms that we did not hear used in the pharmacy settings we were given access to. This suggests that policy level pronouncements haven’t found their way to those on the ground or that the terms used by policy makers and academics do not resonate with those working on the frontline of polypharmacy.

### **Future research**

There have been calls for a greater role of pharmacists in managing high-risk and inappropriate polypharmacy,<sup>6</sup> yet our research suggests that in order for this to take place, pharmacy staff will need to feel in a position to challenge prescribing regimens initiated by other healthcare professionals in the healthcare system. We will consider the role of general practitioners and other health professionals in supporting or challenging polypharmacy in our wider research.

1  
2  
3 **FUNDING STATEMENT:** This work was supported by the National Institute for Health Research  
4 (NIHR) Clinician Scientist Award number CS-2015-15-004. Additionally, this work was supported  
5 by the NIHR Collaboration for Leadership in Applied Health Research and Care (CLAHRC) North  
6 Thames. The views expressed are those of the author(s) and not necessarily those of the NHS,  
7 the NIHR or the Department of Health and Social Care.  
8  
9  
10  
11  
12

13 **A COMPETING INTERESTS STATEMENT:** Non-declared  
14  
15

16 **AUTHOR CONTRIBUTIONS.** The study was conceived by DS. Data gathering and data analysis  
17 were jointly undertaken by DS and NF. NF wrote the first draft of the paper. Both authors  
18 revised and finalised the manuscript.  
19  
20  
21  
22

23 **ACKNOWLEDGMENTS.** We would like to thank staff from the four community pharmacies who  
24 agreed to participate in this study, colleagues at QMUL who commented on an early draft of  
25 the manuscript, and our Expert Advisory Group and Patient Panel for their support of our  
26 research.  
27  
28  
29  
30

31 **ETHICS APPROVAL** The project has ethics approval from Leeds West Research Ethics Committee  
32 (IRAS project ID: 205517; REC reference 16/YH/0462).  
33  
34  
35  
36

37 **DATA SHARING STATEMENT** Our ethics approval and consent procedures were based on the  
38 anonymity of the individuals who participated, hence further access to the full data set cannot  
39 be granted.  
40  
41  
42  
43  
44  
45  
46  
47  
48  
49  
50  
51  
52  
53  
54  
55  
56  
57  
58  
59  
60

## References

1. Smith J. Building a safer NHS for patients: improving medication safety. Available from: [https://webarchive.nationalarchives.gov.uk/http://www.dh.gov.uk/en/Publicationsandstatistics/Publications/PublicationsPolicyAndGuidance/DH\\_4071443](https://webarchive.nationalarchives.gov.uk/http://www.dh.gov.uk/en/Publicationsandstatistics/Publications/PublicationsPolicyAndGuidance/DH_4071443) accessed 07/04/2020.
2. Hidle U. Implementing technology to improve medication safety in healthcare facilities: a literature review. *J N Y State Nurses Assoc* 2007;38:4-9.
3. Wolf ZR. Pursuing safe medication use and the promise of technology. *Medsurg Nursing* 2007;16:92-100.
4. World Health Organisation. Medicines without harm Available from: <https://apps.who.int/iris/bitstream/handle/10665/255263/WHO-HIS-SDS-2017.6-eng.pdf;jsessionid=1FA9FFC80FAEA5ADA5E9359C55375C22?sequence=1> accessed 07/04/2020.
5. Department of Health and Social Care. The Report of the Short Life Working Group on reducing medication-related harm Available from: [https://assets.publishing.service.gov.uk/government/uploads/system/uploads/attachment\\_data/file/683430/short-life-working-group-report-on-medication-errors.pdf](https://assets.publishing.service.gov.uk/government/uploads/system/uploads/attachment_data/file/683430/short-life-working-group-report-on-medication-errors.pdf) accessed 07/04/2020.
6. World Health Organisation. Medication safety in polypharmacy Available from: <https://apps.who.int/iris/bitstream/handle/10665/325454/WHO-UHC-SDS-2019.11-eng.pdf?ua=1> accessed 07/04/2020.
7. Sheikh A, Panesar SS, Larizgoitia I, et al. Safer primary care for all: a global imperative. *Lancet Glob Health* 2013;1:e182-e83.
8. Avery AJ, Ghaleb M, Barber N, et al. The prevalence and nature of prescribing and monitoring errors in English general practice: a retrospective case note review. *Br J Gen Pract* 2013;63:e543-e53.
9. AGE UK. More harm than good. Why more isn't always better with older people's medicines Available from: [https://www.ageuk.org.uk/globalassets/age-uk/documents/reports-and-publications/reports-and-briefings/health--wellbeing/medication/190819\\_more\\_harm\\_than\\_good.pdf](https://www.ageuk.org.uk/globalassets/age-uk/documents/reports-and-publications/reports-and-briefings/health--wellbeing/medication/190819_more_harm_than_good.pdf) accessed 07/04/2020.
10. Mann C, Anderson C, Avery AJ, et al. Clinical Pharmacists in General Practice: pilot scheme Available from: <https://www.nottingham.ac.uk/pharmacy/documents/generalpracticeyearfwdrev/clinical-pharmacists-in-general-practice-pilot-scheme-full-report.pdf> accessed 07/04/2020.
11. Phipps DL, Jones CE, Parker D, et al. Organizational conditions for engagement in quality and safety improvement: a longitudinal qualitative study of community pharmacies. *BMC health services research* 2018;18:1-10.



- 1  
2  
3 12. Hong K, Hong YD, Cooke CE. Medication errors in community pharmacies: The need for  
4 commitment, transparency, and research. *Research in Social and Administrative Pharmacy* 2019;15:823-  
5 26.  
6  
7  
8 13. Phipps DL, Noyce PR, Parker D, et al. Medication safety in community pharmacy: a qualitative study  
9 of the sociotechnical context. *BMC health services research* 2009;9:158-58. doi: 10.1186/1472-6963-9-  
10 158  
11  
12 14. Masnoon N, Shakib S, Kalisch-Ellett L, et al. What is polypharmacy? A systematic review of  
13 definitions. *BMC Geriatrics* 2017;17:230. doi: 10.1186/s12877-017-0621-2  
14  
15  
16 15. Payne RA. The epidemiology of polypharmacy. *Clinical medicine* 2016;16:465.  
17  
18 16. Avery AA, Barber N, Ghaleb M, et al. Investigating the prevalence and causes of prescribing errors in  
19 general practice: the PRACtICE study Available from: [http://www.gmc-](http://www.gmc-uk.org/Investigating_the_prevalence_and_causes_of_prescribing_errors_in_general_practice_The_PRACTICE_study_Reoprt_May_2012_48605085.pdf)  
20 [uk.org/Investigating\\_the\\_prevalence\\_and\\_causes\\_of\\_prescribing\\_errors\\_in\\_general\\_practice\\_The\\_P](http://www.gmc-uk.org/Investigating_the_prevalence_and_causes_of_prescribing_errors_in_general_practice_The_PRACTICE_study_Reoprt_May_2012_48605085.pdf)  
21 [RACTICE\\_study\\_Reoprt\\_May\\_2012\\_48605085.pdf](http://www.gmc-uk.org/Investigating_the_prevalence_and_causes_of_prescribing_errors_in_general_practice_The_PRACTICE_study_Reoprt_May_2012_48605085.pdf) accessed 07/04/2020.  
22  
23  
24 17. Sears K, Scobie A, MacKinnon NJ. Patient-related risk factors for self-reported medication errors in  
25 hospital and community settings in 8 countries. *Can Pharm J* 2012;145:88-93.  
26  
27 18. The King's Fund. Polypharmacy and medicines optimisation - making it safe and sound Available  
28 from: [https://www.kingsfund.org.uk/sites/default/files/field/field\\_publication\\_file/polypharmacy-and-](https://www.kingsfund.org.uk/sites/default/files/field/field_publication_file/polypharmacy-and-medicines-optimisation-kingsfund-nov13.pdf)  
29 [medicines-optimisation-kingsfund-nov13.pdf](https://www.kingsfund.org.uk/sites/default/files/field/field_publication_file/polypharmacy-and-medicines-optimisation-kingsfund-nov13.pdf) accessed 07/04/2020.  
30  
31  
32 19. Hollnagel E, Wears RL, Braithwaite J. From Safety-I to Safety-II: A white paper Available from:  
33 [https://www.england.nhs.uk/signuptosafety/wp-content/uploads/sites/16/2015/10/safety-1-safety-2-](https://www.england.nhs.uk/signuptosafety/wp-content/uploads/sites/16/2015/10/safety-1-safety-2-white-papr.pdf)  
34 [white-papr.pdf](https://www.england.nhs.uk/signuptosafety/wp-content/uploads/sites/16/2015/10/safety-1-safety-2-white-papr.pdf) accessed 07/04/2020.  
35  
36  
37 20. Phipps DL, Ashcroft DM. An investigation of occupational subgroups with respect to patient safety  
38 culture. *Safety science* 2012;50:1290-98.  
39  
40 21. Thomas CE, Phipps DL, Ashcroft DM. When procedures meet practice in community pharmacies:  
41 qualitative insights from pharmacists and pharmacy support staff. *BMJ open* 2016;6  
42  
43  
44 22. Wears RL, Hollnagel E, J. B. Why is work-as-imagined different from work-as-done? In: Wears RL,  
45 Hollnagel E, Braithwaite J, eds. Resilience in everyday clinical work. Farnham Ashgate 2015:249-64.  
46  
47 23. Swinglehurst D, Fudge N. Addressing the polypharmacy challenge in older people with  
48 multimorbidity (APOLLO-MM): study protocol for an in-depth ethnographic case study in primary care.  
49 *BMJ open* 2019;9:e031601.  
50  
51 24. APOLLO-MM. Addressing the Polypharmacy Challenge in Older People Available from:  
52 [www.polypharmacy.org.uk](http://www.polypharmacy.org.uk) accessed 14/02/2020.  
53  
54  
55  
56  
57  
58  
59  
60

- 1  
2  
3 25. McIntosh P. Action research and reflective practice: Creative and visual methods to facilitate  
4 reflection and learning. Abingdon, Oxon: Routledge 2010.  
5  
6  
7 26. Green LW. Making research relevant: if it is an evidence-based practice, where's the practice-based  
8 evidence? *Family practice* 2008;25:i20-i24.  
9  
10 27. Goffman E. Regions and region behaviour. The presentation of self in everyday life: London: Penguin  
11 Books 1959.  
12  
13 28. Liu W, Gerdtz M, Manias E. Challenges and opportunities of undertaking a video ethnographic study  
14 to understand medication communication. *Journal of Clinical Nursing* 2015;24:3707-15. doi:  
15 10.1111/jocn.12948  
16  
17  
18 29. NVivo qualitative data analysis software [program]. Version 12 version, 2018.  
19  
20  
21 30. Nicolini D. Practice theory, work, and organization: An introduction: OUP Oxford 2012.  
22  
23 31. Schatzki TR. A primer on practices: Theory and research. Practice-based education: Brill Sense  
24 2012:13-26.  
25  
26 32. Geertz C. Chapter 1/Thick Description: Toward an interpretive theory of culture.'. *The Interpretation*  
27 *of Cultures: Selected Essays, New York, Basic Books* 1973  
28  
29  
30 33. Royal Pharmaceutical Society. Improving patient outcomes—the better use of multi-compartment  
31 compliance aids Available from:  
32 <https://www.rpharms.com/Portals/0/RPS%20document%20library/Open%20access/Support/toolkit/rps>  
33 [-mca-july-2013.pdf](https://www.rpharms.com/Portals/0/RPS%20document%20library/Open%20access/Support/toolkit/rps) accessed 07/04/2020.  
34  
35  
36 34. Husain I, Minshull J. Summary of Guidance and Evidence for use of Multi-Compartment Compliance  
37 Aids (MCCAs)  
38  
39 Available from: [https://www.sps.nhs.uk/wp-](https://www.sps.nhs.uk/wp-content/uploads/2019/05/SPS_MCCA_briefing_May2019_final.pdf)  
40 [content/uploads/2019/05/SPS\\_MCCA\\_briefing\\_May2019\\_final.pdf](https://www.sps.nhs.uk/wp-content/uploads/2019/05/SPS_MCCA_briefing_May2019_final.pdf) accessed 07/04/2020.  
41  
42  
43 35. Synergy Medical. Why Synmed? Available from: <https://synmedrx.com/#home> accessed  
44 07/04/2020.  
45  
46 36. Synergy Medical. SynMed Benefits Available from: <https://synmedrx.com/#home> accessed  
47 07/04/2020.  
48  
49  
50 37. Tasks-in-interaction: paper and screen based documentation in collaborative activity. Proceedings of  
51 the 1992 ACM conference on Computer-supported cooperative work; 1992.  
52  
53  
54  
55  
56  
57  
58  
59  
60

- 1  
2  
3 38. Greatbatch D, Luff P, Heath C, et al. Interpersonal communication and human-computer interaction:  
4 an examination of the use of computers in medical consultations. *Interacting with computers*  
5 1993;5:193-216.  
6  
7  
8 39. Borup M, Brown N, Konrad K, et al. The sociology of expectations in science and technology.  
9 *Technology analysis & strategic management* 2006;18:285-98.  
10  
11 40. Mol A. *The logic of care: Health and the problem of patient choice*: Routledge 2008.  
12  
13  
14 41. Swinglehurst D, Greenhalgh T, Russell J, et al. Receptionist input to quality and safety in repeat  
15 prescribing in UK general practice: ethnographic case study. *BMJ* 2011;343:d6788. doi:  
16 10.1136/bmj.d6788  
17  
18 42. Grant S, Guthrie B. Efficiency and thoroughness trade-offs in high-volume organisational routines: an  
19 ethnographic study of prescribing safety in primary care. *BMJ Quality & Safety* 2018;27:199-206.  
20 doi: 10.1136/bmjqs-2017-006917  
21  
22  
23 43. Farre A, Shaw K, Heath G, et al. On doing 'risk work' in the context of successful outcomes: exploring  
24 how medication safety is brought into action through health professionals' everyday working practices.  
25 *Health, Risk & Society* 2017;19:209-25. doi: 10.1080/13698575.2017.1336512  
26  
27  
28 44. Harvey J, Avery AJ, Ashcroft D, et al. Exploring safety systems for dispensing in community  
29 pharmacies: focusing on how staff relate to organizational components. *Research in Social and*  
30 *Administrative Pharmacy* 2015;11:216-27.  
31  
32 45. Knudsen P, Herborg H, Mortensen A, et al. Preventing medication errors in community pharmacy:  
33 frequency and seriousness of medication errors. *BMJ Quality & Safety* 2007;16:291-96.  
34  
35  
36  
37  
38  
39  
40  
41  
42  
43  
44  
45  
46  
47  
48  
49  
50  
51  
52  
53  
54  
55  
56  
57  
58  
59  
60

## Staff Interviews (Pharmacy)

The focus of our research is on patients who are prescribed many medicines for their medical conditions (*polypharmacy*). In this interview we would like to **learn about the work you do** and about **who** and **what** is involved.

**So first could you please start off by telling me:**

- **how long you have worked here**
- **your job title and**
- **any training you've done to work here**

- 1. What are the key routines – all the different things you have to do - you are involved in that support patients who are prescribed many medicines?**
- 2. Please can you select ONE of these routines and talk me through what happens in detail** (*If they struggle to identify a routine we pick one e.g. 'dossette box production' 'repeat dispensing' 'checking routines' 'dossette box preparation' 'deblistering', ordering drugs, 'filling the robot'*)
  - (What is involved in this routine?)
  - (Who is involved in this routine?)
  - Who is responsible for different aspects of this routine?
  - Can you describe a challenge that you have recently encountered while doing this particular work? How did you approach this?
- 3. Please would you tell me about the example that you thought about before the interview?**  
(*Pre-interview: Please would you come to the interview prepared to tell us about a particular story or incident, case, prescription or puzzle that has involved a patient who is prescribed many medicines*)
  - Please will you talk me through it?
  - Why did you select this particular example?
  - (What happened / What happened next?)
  - How did this experience make you feel?
  - What did you learn from this experience?
- 4. What are your main priorities when managing the prescriptions of people who are prescribed many medicines / when you do your work?**
  - Why is this priority (are these priorities) important to you?
  - How does this priority influence what you do in practice?
  - Can you describe an example of something you have done recently in your work that shows your commitment to this priority?

1  
2  
3 **5. How has the electronic prescribing system changed how you work and**  
4 **what you have to do?**  
5  
6  
7

8 **6. Is there something else you would like to talk about?**  
9  
10  
11  
12  
13  
14  
15  
16  
17  
18  
19  
20  
21  
22  
23  
24  
25  
26  
27  
28  
29  
30  
31  
32  
33  
34  
35  
36  
37  
38  
39  
40  
41  
42  
43  
44  
45  
46  
47  
48  
49  
50  
51  
52  
53  
54  
55  
56  
57  
58  
59  
60

For peer review only

# BMJ Open

**“It’s all about patient safety”: an ethnographic study of how pharmacy staff construct medicines safety in the context of polypharmacy.**

|                                 |                                                                                                                                                                                           |
|---------------------------------|-------------------------------------------------------------------------------------------------------------------------------------------------------------------------------------------|
| Journal:                        | <i>BMJ Open</i>                                                                                                                                                                           |
| Manuscript ID                   | bmjopen-2020-042504.R1                                                                                                                                                                    |
| Article Type:                   | Original research                                                                                                                                                                         |
| Date Submitted by the Author:   | 30-Nov-2020                                                                                                                                                                               |
| Complete List of Authors:       | Fudge, Nina ; Queen Mary University of London, Institute of Population Health Sciences<br>Swinglehurst, Deborah; Queen Mary University of London, Institute of Population Health Sciences |
| <b>Primary Subject Heading</b>: | Qualitative research                                                                                                                                                                      |
| Secondary Subject Heading:      | General practice / Family practice                                                                                                                                                        |
| Keywords:                       | PRIMARY CARE, QUALITATIVE RESEARCH, Quality in health care < HEALTH SERVICES ADMINISTRATION & MANAGEMENT                                                                                  |
|                                 |                                                                                                                                                                                           |

SCHOLARONE™  
Manuscripts



I, the Submitting Author has the right to grant and does grant on behalf of all authors of the Work (as defined in the below author licence), an exclusive licence and/or a non-exclusive licence for contributions from authors who are: i) UK Crown employees; ii) where BMJ has agreed a CC-BY licence shall apply, and/or iii) in accordance with the terms applicable for US Federal Government officers or employees acting as part of their official duties; on a worldwide, perpetual, irrevocable, royalty-free basis to BMJ Publishing Group Ltd ("BMJ") its licensees and where the relevant Journal is co-owned by BMJ to the co-owners of the Journal, to publish the Work in this journal and any other BMJ products and to exploit all rights, as set out in our [licence](#).

The Submitting Author accepts and understands that any supply made under these terms is made by BMJ to the Submitting Author unless you are acting as an employee on behalf of your employer or a postgraduate student of an affiliated institution which is paying any applicable article publishing charge ("APC") for Open Access articles. Where the Submitting Author wishes to make the Work available on an Open Access basis (and intends to pay the relevant APC), the terms of reuse of such Open Access shall be governed by a Creative Commons licence – details of these licences and which [Creative Commons](#) licence will apply to this Work are set out in our licence referred to above.

Other than as permitted in any relevant BMJ Author's Self Archiving Policies, I confirm this Work has not been accepted for publication elsewhere, is not being considered for publication elsewhere and does not duplicate material already published. I confirm all authors consent to publication of this Work and authorise the granting of this licence.

1  
2  
3  
4 **Title of the article:** "It's all about patient safety": an ethnographic study of how pharmacy staff  
5 construct medicines safety in the context of polypharmacy.  
6  
7

8  
9 **Authors (full name, department, institution, city and country of all co-authors):**

10  
11 Nina Fudge BA (Hons), MSc, PhD, FHEA  
12 Institute of Population Health Sciences  
13 Barts and The London School of Medicine and Dentistry  
14 Queen Mary University of London  
15 London, UK  
16

17  
18 Deborah Swinglehurst MBBS MA MSc PhD FHEA FRCGP  
19 Institute of Population Health Sciences  
20 School of Medicine and Dentistry  
21 Queen Mary University of London  
22 London, UK  
23  
24

25  
26 **Corresponding author:**

27  
28 Deborah Swinglehurst  
29 Institute of Population Health Sciences  
30 School of Medicine and Dentistry  
31 Queen Mary University of London  
32 London, UK  
33  
34

35  
36 Email: [d.swinglehurst@qmul.ac.uk](mailto:d.swinglehurst@qmul.ac.uk)  
37  
38  
39  
40  
41

42 **Word count 4,876 (excluding title page, abstract, article summary, references, and tables)**  
43  
44  
45  
46  
47  
48  
49  
50  
51  
52  
53  
54  
55  
56  
57  
58  
59  
60



**ABSTRACT**

**Objective:** As polypharmacy increases, so does the complexity of prescribing, dispensing and consuming medicines. Medication safety is typically framed as the avoidance of harm, achievable through adherence to policies, guidelines and operational standards. Automation, robotics and technologies are positioned as key players in the elimination of medication error in the face of escalating demand, despite limited research illuminating how these innovations are taken up, used and adapted in practice. We explore how 'safety' is constructed and accomplished in community pharmacies in the context of polypharmacy.

**Design and setting:** In-depth ethnographic case study across four community pharmacies in England (December 2017 – July 2019). Data collection entailed 140 hours participant observation and 19 in-depth interviews. Practice theory informed the analysis.

**Participants:** 33 pharmacy staff (counter staff, technicians, dispensers, pharmacists).

**Results:** In their working practices related to polypharmacy, staff used the term 'safety' in explanations of why and how they were doing things in particular ways. We present three interlinked analytic themes within an overarching narrative of care: caring for the technology; caring for each other; and caring for the patient. Our study revealed a paradox: polypharmacy was visible, pervasive and productive of numerous routines, but rarely discussed as a safety concern *per se*. Safety meant ensuring medicines were dispensed as prescribed, and correcting errors pertaining to individual drugs through the clinical check. Pharmacy staff did not actively challenge polypharmacy, even when the volume of medicines dispensed might indicate 'high risk', locating the responsibility for polypharmacy with prescribing clinicians.

1  
2  
3 **Conclusion:** ‘Safety’ in the performance of practices relating to polypharmacy was not a fixed,  
4 defined notion, but an ongoing, collaborative accomplishment, emerging within an  
5 organisational narrative of ‘care’. Despite meticulous attention to ‘safety’, carefully guarded  
6 professional boundaries meant that addressing polypharmacy *per se* in the context of  
7 community pharmacy was beyond reach.  
8  
9  
10  
11  
12  
13  
14  
15  
16

### 17 **ARTICLE SUMMARY - Strengths and limitation of this study:**

- 18  
19 
- 20 • Adopts an ethnographic approach, observing the practices of pharmacy staff ‘doing  
21 safety’ in the particular context in which it happens, rather than relying on interview  
22 accounts  
23
  - 24 • Two researchers conducted observations, interviews and analysis, allowing different  
25 professional perspectives to inform the analysis, enhancing the study’s credibility.  
26
  - 27 • Some aspects of the setting were inaccessible e.g. management decisions about  
28 ‘running the business’ of a community pharmacy.  
29
  - 30 • Our findings may not translate readily outside the context of independent community  
31 pharmacies, but our interpretations offer useful ways of conceptualising safety across  
32 UK and international settings.  
33  
34  
35  
36  
37  
38  
39  
40  
41  
42  
43  
44  
45  
46  
47  
48  
49  
50  
51  
52  
53  
54  
55  
56  
57  
58  
59  
60

## INTRODUCTION

Safety in prescribing, dispensing, and administering medicines is a global public health priority.<sup>1-5</sup> The World Health Organisation defines medicines safety as ‘protect[ing] patients from harm while maximizing the benefits from medication’.<sup>6</sup> Efforts to address medicines safety have traditionally targeted secondary care. Attention is now turning to primary care settings where a growing population of older people with multimorbidity, escalating prescribing and polypharmacy drive a greater burden of iatrogenic harm.<sup>6-10</sup> Community pharmacies provide a key role within medicines management in primary care, integrating multiple tasks related to medication (including but not limited to dispensing and delivering prescriptions, dispensing medicines through multi-compartment compliance aids (MCCAs), and counselling patients through medication use reviews) with the need to operate as viable commercial businesses.<sup>11</sup> This work has become increasingly challenging and complex due to polypharmacy, but how safety is enacted and produced in community pharmacy settings amidst this complexity remains poorly understood.<sup>12,13</sup>

Polypharmacy is usually defined as the concurrent use of five or more medications.<sup>6,14</sup> Differences in the way polypharmacy is defined and medication data is collected make international comparisons challenging, but several international studies demonstrate increasing polypharmacy in older populations.<sup>15</sup> The risks of polypharmacy are well documented: medicine errors, adverse drug reactions, falls, frailty, hospital admission, increased hospital stay, and death.<sup>16,17</sup> In recognition that in some cases people may need multiple item prescriptions to treat their conditions, a distinction has been made between ‘appropriate’ polypharmacy or ‘problematic’ polypharmacy.<sup>18</sup>

Medication safety is typically framed as avoidance of error. Professional regulators and leadership bodies encourage reporting of errors, metrics for safe prescribing<sup>5</sup> and removal of inherent weaknesses in the system.<sup>6</sup> A more nuanced approach is now emerging, shifting the focus away from how errors are produced and avoided (which draws attention to a minority of

1  
2  
3 incidents) towards what can be learned from observing ordinary everyday performance, where  
4 – mostly – practice occurs error-free (a ‘Safety II’ approach).<sup>19</sup>  
5  
6  
7

8  
9 Previous work on safety in community pharmacies has presented safety culture as a product of  
10 managing the complex relationship between medicines-related workloads and maintaining  
11 commercial viability.<sup>20</sup> While safety improvement may be enabled by managers and  
12 institutional policies, it is *enacted* by frontline staff and therefore evolves as a result of this  
13 enactment.<sup>11</sup> One study, based on interview data, has suggested that implementation of  
14 procedures is subject to an interplay between *procedures-as-imagined* and *procedures-as-done*  
15 .<sup>21,22</sup> Adopting the term ‘organisational resilience’, Thomas *et al* call for further research to  
16 investigate *how* organisational culture contributes to decision making and action around  
17 implementation of standardised procedures.<sup>21</sup>  
18  
19  
20  
21  
22  
23  
24  
25  
26

27 We are adopting a Safety II orientation to our study of polypharmacy,<sup>23,24</sup> conducting  
28 ethnographic and participatory research across primary care settings (patients’ homes, general  
29 practice, community pharmacy), seeking to generate ‘practice-based evidence’.<sup>25</sup> We address  
30 the research question: How is patient safety constructed in community pharmacy settings in  
31 the context of polypharmacy?  
32  
33  
34  
35  
36  
37

## 38 **METHODS**

### 39 **Setting**

40  
41  
42  
43  
44  
45  
46  
47  
48  
49  
50  
51  
52  
53  
54  
55  
56  
57  
58  
59  
60

1  
2  
3 This study was part of an in-depth, multi-site ethnographic study of polypharmacy in primary  
4 care (APOLLO-MM - protocol previously published<sup>23</sup>). We conducted an organisational  
5 ethnography of routines and practices in four English community pharmacies, pseudonymised  
6 Willow, Foxglove (part of Woodland Independent Pharmacy Group), Poppy and Lilac (part of  
7 Meadow Independent Pharmacy Group) (see table 1). Pharmacies were recruited along with GP  
8 practices to form contrasting research clusters. Each cluster (GP + pharmacies) provide  
9 medicine services to our patient participants in the wider APOLLO-MM study.<sup>23</sup>  
10  
11  
12  
13  
14  
15  
16  
17  
18  
19  
20  
21  
22  
23  
24  
25  
26  
27  
28  
29  
30  
31  
32  
33  
34  
35  
36  
37  
38  
39  
40  
41  
42  
43  
44  
45  
46  
47  
48  
49  
50  
51  
52  
53  
54  
55  
56  
57  
58  
59  
60

For peer review only

**Table 1: Characteristics of study pharmacies**

| Location                                                  | Index of multiple deprivation 2019 <sup>†</sup>                                       | Study Pharmacy | Number of staff                                                                                           |                                                                                    |
|-----------------------------------------------------------|---------------------------------------------------------------------------------------|----------------|-----------------------------------------------------------------------------------------------------------|------------------------------------------------------------------------------------|
| <b>Woodland Independent Pharmacy Group</b> (3 pharmacies) | 30% most deprived LSOA‡                                                               | Willow         | 2 pharmacists<br>1 trainee pharmacist<br>8 dispensers/technicians<br>2 counter staff<br>1 delivery driver | Group pharmacist owners (n=2) who oversee pharmacies and cover staff when needed.  |
|                                                           | Urban setting<br>6% of local population 65 years or older (55% female, 47% male)*     | Foxglove       | 2 pharmacists<br>2 counter staff<br>8 dispensers/technicians                                              |                                                                                    |
| <b>Meadow Independent Pharmacy Group</b> (5 pharmacies)   | 20% least deprived LSOA                                                               | Poppy          | 1 pharmacist<br>2 dispensers<br>1 Part-time counter staff<br>1 delivery driver                            | Group pharmacist owner (n=1) who oversees pharmacies and covers staff when needed. |
|                                                           | Suburban setting<br>17% of local population 65 years or older (55% female, 45% male)* | Lilac          | 1 pharmacist<br>1 dispenser<br>2 dispensers/counter staff<br>1 delivery driver                            |                                                                                    |

\*<https://fingertips.phe.org.uk/profile/health-profiles>

†<https://www.gov.uk/guidance/english-indices-of-deprivation-2019-mapping-resources#indices-of-deprivation-2019-explorer-postcode-mapper>

‡LSOA, Layer Super Output Area or Neighbourhood

Two researchers (NF, a social anthropologist and DS, an academic GP, both experienced ethnographers) undertook data collection and analysis. Data included: ethnographic observations; shadowing staff, inviting them to “talk me through what you are doing”; formal interviews; documents (e.g. standard operating procedures, dosette checklists, to do lists,

manufacturer's guidance identified as relevant through our observations and interviews). We conducted 140 hours observation (December 2017 – January 2018; December 2018 – February 2019, March – July 2019), focusing on everyday routines and practices concerning polypharmacy and the management of patients with multimorbidity. This work occurred primarily in 'backstage' regions of the pharmacies,<sup>26</sup> such as dispensaries and areas designated for preparation of multi-compartment compliance aids (MCCAs) – known as 'dosettes' at all sites.

We used one-to-one briefing sessions, posters, and information leaflets to ensure informed consent from participants. We adopted a 'processual consent' approach, revisiting consent iteratively before each occasion of observation.<sup>27</sup>

We conducted 19 formal interviews with 21 pharmacy staff identified through ethnographic observations as doing work relevant to polypharmacy and its safety (including one group interview) (see table 2). Interviewees signed consent forms in advance. We adopted a narrative approach, using a broad topic guide, inviting in-depth accounts of working practices (Supplement 1). We asked participants to attend the interview prepared to share a story relating to polypharmacy. Interviews lasted 14 - 59 minutes, were audio-recorded and transcribed verbatim.

**Table 2: Pharmacy interviews**

| Pharmacy | Pharmacist/pharmacy group owner | Pharmacist | Pharmacy technician | Dispenser  | Counter staff | Total |
|----------|---------------------------------|------------|---------------------|------------|---------------|-------|
| Willow   | 1(m=1)                          | 3(f=1,m=2) | 1(m=1)              | 4(f=3,m=1) |               | 9     |
| Foxglove |                                 | 2(m=2)     | 2(m=1)              | 3(f=2,m=1) |               | 7     |
| Poppy    | 1(f=1)                          | 1(m=1)     |                     | 1(f=1)     |               | 3     |
| Lilac    |                                 |            |                     | 1(f=1)     | 1(f=1)        | 2     |

**f = female, m = male**

### Data analysis

The dataset comprised 280 pages of typed fieldnotes, 279 pages of transcribed interviews, and 46 documents. Fieldnotes were typed after observations/interviews (usually within 24 hours),

1  
2  
3 incorporating reflections and theoretical insights, then shared between NF and DS to prompt  
4 further critical reflection guided by our different fieldwork experiences and disciplinary  
5 orientations. This informed subsequent fieldwork, and ensured a coherent approach to data  
6 gathering. We kept a digital, reflective journal using Evernote®, sharing memos, observations  
7 and theoretical insights relevant to the wider polypharmacy project. We used QSR NVivo 12  
8 qualitative data analysis software for data management.<sup>28</sup> The data we present is anonymised;  
9 names for pharmacies, interviewees and staff are pseudonyms.  
10  
11  
12  
13  
14  
15  
16  
17

18 The analysis was inductive, with ‘safety’ emerging early in our analysis as an organising frame  
19 for the work of repeat dispensing for patients experiencing polypharmacy. We directed our  
20 analysis to the tasks and routines staff undertook, how these constituted notions of patient  
21 safety, and how staff accomplished safety-in-practice.<sup>19</sup> Informed by practice theory, we  
22 focused on interconnections between people, artefacts, spaces and technologies. Under this  
23 lens, organisations are conceptualised as ‘bundles of practices’ and management is an activity  
24 aimed at ensuring that social and material activities work more-or-less in alignment.<sup>29,30</sup>  
25  
26  
27  
28  
29  
30  
31  
32

### 33 **Patient and public involvement**

34 We have a project advisory group of 11 members (academics, health professionals,  
35 representation from Age UK, two patient members, lay chair). An online patient panel of five  
36 members were involved in: proposal development, design of participant materials and project  
37 website ([www.polypharmacy.org.uk](http://www.polypharmacy.org.uk)), application for ethical approval, project launch event,  
38 piloting of interviews, study design and conduct.  
39  
40  
41  
42  
43  
44

### 45 **RESULTS**

46  
47 ‘Safety’ was a collective concern in all pharmacies. Staff used the term ‘safety’ in explanations  
48 of how and why they did certain things: picking medicines from shelves in a particular order;  
49 asking patients for names and addresses; switching tasks regularly. In naturalistic talk, staff did  
50  
51  
52  
53  
54  
55  
56  
57  
58  
59  
60



1  
2  
3 not articulate what constitutes 'safety', but in interviews they referred to safety as 'the right  
4 drug, the right patient, the right time'.

5  
6 The pharmacies used various technologies (e.g. robots, MCCAs, spreadsheets, computers,  
7  
8 telephones, printouts, labels, post-it notes) in the process of dispensing (see table 3). Willow  
9  
10 has two robots which automate in-house dispensing and MCCA production, acting as a 'dosette  
11  
12 production hub' for all the Woodland pharmacies. Poppy and Lilac had considered automating  
13  
14 dosette production but reported it was not financially viable.  
15

16  
17  
18  
19  
20 **Table 3: detailed ethnographic description, (known as 'thick description') of the four**  
21  
22 **community pharmacies** <sup>31</sup>  
23  
24  
25  
26  
27  
28  
29  
30  
31  
32  
33  
34  
35  
36  
37  
38  
39  
40  
41  
42  
43  
44  
45  
46  
47  
48  
49  
50  
51  
52  
53  
54  
55  
56  
57  
58  
59  
60

### Woodland Independent Pharmacy Group

**Willow** pharmacy, housed in purpose-built premises, has a small footprint given the volume of medicines it dispenses. Much of their work comes from the GP surgery over the road. Every bit of space is taken up with stores of medicines: small boxes of pills in blister packs on shelves from counter to ceiling; large canisters of barrier creams, syrups and fortified milkshakes on lower shelves below the counters; robot-prepared dosette boxes stacked in floor-to-ceiling shelves. Delivery men visit twice daily, trolleys laden with large cardboard boxes full of medicines that are unpacked, cross-checked off the order sheet and stacked on the shelves as quickly as they are removed. At regular intervals, the low hubbub of dispensing and dosette box production work is punctuated by a woman at the front counter calling out 'Prescription waiting!' as she clips the prescription on a tiny metal hanger at the front of the dispensary. The low whooshing noise from the dispensing robot signals drugs ready for a technician and pharmacist to check, bag up and pass to a customer. All 10-15 staff move quickly around the space as they gather up medicines, stack the shelves, deblist tablets to replenish the hungry robots, add a reminder to the whiteboard or post-it note, respond to customers - switching seamlessly between languages as needed. They skillfully navigate the tight space, shifting boxes, climbing steps, passing medicines from one to the other and always listening out for each other.

**Foxglove**, sister pharmacy of Willow, has an even smaller footprint than Willow. It's housed in a converted Victorian building, within a row of shops with flats above. Entering the pharmacy through an automatic sliding door signals the shop has recently been modernized. A padded bench along one wall allows customers to sit while they wait. A selection of over-the-counter medicines is on display. The front counter is staffed by two people, handling patients who hand over their paper prescriptions or ask to pick up medicines. Counter staff flick through a card file to find a customer's prescription which cross-checks to a numbered shelf where medicines have been bagged up, waiting for patients to collect them. The dispensary is at the back with an eye-level counter, giving staff cover as well as a view of what's happening on the shop floor. The dosette area is hidden from customer view, even further back in this Tardis-like building and is particularly narrow. Here, a counter runs the length of one wall, which the 'dosette team' use to check the robot-produced dosettes (sent over from Willow) for errors before they are given to patients. Pharmacists tip and flick the dosette box from underneath to check and count the capsules and tablets in each cell. Floor to ceiling shelving runs around the room, storing each patient's four-weekly supply of dosettes, stored alphabetically by patient's surname and according to their collection or delivery day. As with Willow, there are on average 10 staff diligently working away, but always with an ear out to help one another.

### Meadow Independent Pharmacy Group

A steep slope marks the entrance to **Poppy** pharmacy, located opposite a GP practice, in a quiet, residential part of a suburban town. I wonder how some older customers navigate this entrance, but a sign on the door tells people to ask for help if needed. Each time the door opens a tune bleeps out, signalling the arrival or departure of a customer or delivery man. This immediately prompts someone to leave the dispensary which is in a raised area at the back of the shop, to leave their tasks, come forward and ask 'how can I help?' The shop floor houses an array of over-the-counter medicines and beauty items. It has a welcoming feel, with a row of chairs opposite the counter for customers waiting for prescriptions or just needing a seat. There are usually two or three people working in the shop at a time, in quiet dedication to their tasks. When there are no customers, staff focus on dispensing prescriptions, preparing baskets for filling dosettes, checking dispensed medicines, answering the phone, ordering medicines and receiving deliveries. Every available wall space is full of shelving to house medicines. Sticky, fluorescent yellow labels stuck to the shelves remind staff to 'select with care'.

**Lilac** pharmacy is in a parade of shops: a builder's trade shop, fish and chip shop, Co-op mini supermarket and a café in a suburban residential area. I am struck by a large sign plastered along the length of the front window 'FREE DELIVERY', similar to a sign on the glass shop front at Poppy. Inside it's very calm and quiet - the door opens onto a spacious, airy and light shop with shelves displaying all manner of over-the-counter medicines and beauty products, even children's toys. People frequently come in for a chat with the counter staff - often without even the excuse of a prescription to pick up. Despite the large shop floor, space behind the counter in the dispensary and dosette areas is tight - when I'm there, as with all the other pharmacies, I feel I am in the way although nobody seems to mind. I notice all the worktops are black, and Leena, the pharmacy manager, explains that all the pharmacies in the group are replacing their worktops with black ones. I am told that black worktops make the white tablets easier to see: when checking and counting tablets staff can simply lay the clear plastic dosette box on the worktop and easily see the number of pills in each cell. Compared to the Woodland group pharmacies, pace of work at the Meadow group pharmacies is less frenetic.

1  
2  
3 Preparation, storage and delivery of dosettes to support medicines-taking was a prominent  
4 working routine across both pharmacy groups, with demand growing despite reports  
5 questioning their safety.<sup>32,33</sup> Meadow Group's manager reported '*we are taking on extra work*'  
6 since larger, chain pharmacies were reducing this service. A handwritten poster at Willow  
7 showed dosette production increasing 10% from 252 to 278 patients over 7 months. All  
8 pharmacies used Electronic Prescribing Systems (EPS) to receive prescriptions from GPs and  
9 order prescriptions from GPs on patients' behalf.  
10  
11  
12  
13  
14  
15  
16

17 We present three interlinked themes which show how staff accomplish safety within an  
18 organisational narrative of care: caring for the technology; caring for each other; caring for the  
19 patient.  
20  
21  
22  
23

### 24 **Caring for the technology**

25 Two technologies, dosette robots and EPS, illustrate how new routines and discourses emerge  
26 when technologies are introduced, and how 'traditional' technologies such as paper charts,  
27 post-it notes and whiteboards remain critical to the safety of medicines routines.  
28  
29  
30  
31  
32  
33  
34  
35  
36  
37  
38  
39  
40  
41  
42  
43  
44  
45  
46  
47  
48  
49  
50  
51  
52  
53  
54  
55  
56  
57  
58  
59  
60

view only

1  
2  
3 Staff at Woodland pharmacies regularly described the dosette robot, and their work with it, as  
4 contributing to patient safety: *'Number one reason is patient safety'*; *'Everything is for patient*  
5 *safety'*; *'We got the robot for patient safety'*. This well-rehearsed collective narrative appealed  
6 to staff and drove the implementation and ongoing use of the robot, although staff were never  
7 explicit about what constitutes 'safety' nor how the robot contributed to it. We interpret staffs'  
8 statements about safety as resonating with the robot manufacturer's such as *'increased*  
9 *accuracy'* compared to the *'manual preparation method'* enabling *'the pharmacy to greatly*  
10 *increase safety'* (Document: robot manufacturer's website). The website also boasts that  
11 dosettes are *'proven to boost adherence rates from 61% to 97%'*, and that the robot offers  
12 *'competitive advantage'* through *'lower production costs'*, *'increase in production speed'*, and a  
13 *'significant decrease in labour costs'* (Document: robot manufacturer's website). The presumed  
14 economic benefits were invisible to us; staff did not express any connection between robot and  
15 revenue.  
16  
17  
18  
19  
20  
21  
22  
23  
24  
25  
26  
27  
28  
29  
30  
31  
32  
33  
34  
35  
36  
37  
38  
39  
40  
41  
42  
43  
44  
45  
46  
47  
48  
49  
50  
51  
52  
53  
54  
55  
56  
57  
58  
59  
60

review only

1  
2  
3 Automation of dosette production has not eliminated the need for human care. The robot is  
4 never left alone when *'in production'* (i.e. filling dosettes). It has generated new scope for errors  
5 and new working routines to address errors. For example, staff must constantly *'replenish'* the  
6 robot's 400 translucent blue containers; drugs in underfilled containers are beyond the reach of  
7 the robot's suction arm which lifts drugs one-by-one into the programmed dosette cells. This  
8 requires technical knowledge about a drug's stability and sophisticated local knowledge about  
9 how fast the lines are – *'slow lines'* demand less frequent attention than *'fast lines'*. The  
10 *'replenishing'* process involves staff *'deblistering'* tablets or capsules from their packaging by  
11 feeding blister packs through a deblistering machine, depositing tablets into shallow plastic  
12 trays for labelling by drug name, batch number, description, and number of tablets. A co-  
13 worker pours the tablets into the matched robot container, first selecting the correct container  
14 lid - with holes just big enough to enable the suction mechanism to pick out a single tablet for  
15 each cell. After filling, staff do manual checks to ensure the dosette contains the right number  
16 of items per cell and that pills have not accidentally *'jumped'* from cell to cell as sometimes  
17 happens. Certain medicines (*'externals'*) are not kept in the robot; they may have limited shelf  
18 life after deblistering or be *'slow lines'*. Staff add these manually once the robot has completed  
19 a patient's four-week set.

20  
21  
22 The pharmacy has protocols and standard operating procedures but when we enquire of their  
23 whereabouts the manager says they are *'locked in a cupboard in the staff room.'* Probing  
24 further we discover that although the robot was installed over two years ago they are *'still*  
25 *working'* on their protocol for dosette production which *'changes all the time'*. The pharmacy  
26 manager continues *'we are so busy and demand is increasing. When we reach the pinnacle we*  
27 *will write something. I usually just ask the staff and they tell me what's the best way'* (Fieldnote,  
28 Willow, 09/01/2018, DS). His quote illustrates the importance of local knowledge, grounded in  
29 practice, and how this becomes constructed through informal communication rather than  
30 formal protocol.

1  
2  
3 EPS is central to dispensing routines, but pharmacy staff adopted a range of workarounds to  
4 ensure safety that developers of the EPS system may not have envisaged. It was striking that  
5 across all pharmacies *all* prescriptions sent electronically by GPs (via the NHS 'spine') were  
6 printed. The working day was punctuated at c.15 minute intervals by staff '*refreshing*' the EPS  
7 screen to view and print new scripts, a routine they considered essential to safe working  
8 practice. Only paper had sufficient 'ecological flexibility'<sup>34</sup> to enable swift movement of the  
9 prescription around different physical spaces in ways which supported their collaborative  
10 working – the same paper prescription passed from person-to-person moving in and out of  
11 different working routines. Its materiality was important, serving as a handy checklist for  
12 picking medicines off the shelves, checking medicines before '*bagging up*', and handing the  
13 '*right medicines to the right patients*' (see table 4). Jimi, Woodland's manager, explained that  
14 portable electronic devices would not do the job; they have no access to a secure wireless  
15 internet connection. Given his innovation with robot technologies, we interpret this not as  
16 resistance to technology *per se*, rather an expression that the technology is insufficiently  
17 flexible for tasks required.<sup>34,35</sup>  
18  
19  
20  
21  
22  
23  
24  
25  
26  
27  
28  
29  
30  
31  
32  
33  
34  
35  
36  
37  
38  
39  
40  
41  
42  
43  
44  
45  
46  
47  
48  
49  
50  
51  
52  
53  
54  
55  
56  
57  
58  
59  
60

Table 4: Electronic prescribing routines

| Routines involving the printed copy of the electronic prescription                                                                                                                                                                                                                                                                                      | Examples from fieldnotes and interviews                                                                                                                                                                                                                                                                                                                                                                                                                                                                                                                                                                                                                                                                                                                                                                                                                                                                                                                                                                                                                                                                                                                                                                                                                                                                                                                                                                                                                                                                                                                                                                                                                                                                                                                                                                                                                                                                                                                                                                                                                                                                                                                                                                                                                                                 |
|---------------------------------------------------------------------------------------------------------------------------------------------------------------------------------------------------------------------------------------------------------------------------------------------------------------------------------------------------------|-----------------------------------------------------------------------------------------------------------------------------------------------------------------------------------------------------------------------------------------------------------------------------------------------------------------------------------------------------------------------------------------------------------------------------------------------------------------------------------------------------------------------------------------------------------------------------------------------------------------------------------------------------------------------------------------------------------------------------------------------------------------------------------------------------------------------------------------------------------------------------------------------------------------------------------------------------------------------------------------------------------------------------------------------------------------------------------------------------------------------------------------------------------------------------------------------------------------------------------------------------------------------------------------------------------------------------------------------------------------------------------------------------------------------------------------------------------------------------------------------------------------------------------------------------------------------------------------------------------------------------------------------------------------------------------------------------------------------------------------------------------------------------------------------------------------------------------------------------------------------------------------------------------------------------------------------------------------------------------------------------------------------------------------------------------------------------------------------------------------------------------------------------------------------------------------------------------------------------------------------------------------------------------------|
| <p>Refreshing the screen, printing out newly arrived prescriptions, leafing through the printouts to organise the workflows and routines:</p> <ul style="list-style-type: none"> <li>• Does everything look in order?</li> <li>• Any obvious anomalies?</li> <li>• Anything urgent?</li> <li>• Anything need to be ordered for the next day?</li> </ul> | <p>When he's not serving at the counter, Mahendra, the pharmacist, is at the dispensary computer dealing with prescriptions. He has refreshed the screen and printed out a batch of prescriptions. As he processes each prescription on the computer, he puts the paper prescription in a red plastic basket with labels which he's also printed out: a bag label and a label for each medicine prescribed. At this point he may also order any medicines needed. He stacks prepared baskets on top of each other. This pile of baskets waits for a dispenser to take a basket, pick and select the required drugs, before handing back to Mahendra to do the final check and bag up the medicines. (Fieldnote, Poppy, 25/03/2019, NF)</p> <p>With a pile of freshly printed out prescriptions, Sameer, the pharmacist, explains that you can't just sort them by patient and put them in the basket for the dispensers to start processing, because there might be urgent ones that need to be processed straight away. Instead, you <i>'have to sift through to see what is important.'</i> After visually scanning and each prescription, he has identified three prescriptions which processing first. One is for a rescue pack for a COPD patient; an acute situation as the patient will want the drugs today. Another acute case - a urine infection. The third one is for meal replacement drinks. These will need to be ordered today so the patient can get them tomorrow. Sameer continues with his explanation <i>'so I put these ones [the thicker pile of the recently printed prescriptions] behind this lot [a pile of prescriptions already in the grey basket] because they came through last and then I put these three [the urgent ones] on top because they are important.'</i> (Fieldnote, Willow, 09/01/2019, NF)</p> <p>Shabnam is now going through the pile of recently printed electronic prescriptions. She is sorting through them at speed and putting certain ones to one side. She explains that she <i>'tries to take out the bigger ones, leave the easier ones for the others to do 'cos I'm more experienced'</i> and they can do the easier ones in between dealing with <i>'waitings or collections'</i>. (Fieldnote, Willow, 10/01/2019, NF)</p> |
| <p>Paper prescriptions can easily move about the pharmacy and be transferred from one member of staff to another to complete a dispensing routine</p>                                                                                                                                                                                                   | <p>Mo took a small yellow card marked <i>'Willow pharmacy'</i> at the top of which was a sticker with a patient's name and address details. He looked in the black filing cabinet under the relevant patient's surname, pulled out a prescription then put a box of multivitamin tablets and the prescription into a small, red, plastic basket. He went to the front counter and I heard him explain that <i>'there is only one'</i>. He then returned to the black filing cabinet, found another green prescription marked <i>'repeat dispensing'</i> and made up another small red basket containing the script and a box of emollient, and took this to the front counter. Linda took over, taking hold of the basket. Mo moved quickly round the corner to dispense some methadone in the supervision corner. I realise I am once again a bit perplexed about this apparently simple transaction - and am yet to fully grasp the path of prescriptions around this front counter area. The problem is that it is so fast moving and the routines are so tacit and collectively embodied that nothing much is said and opportunity to ask them to explain is limited by the frenetic nature of the environment. I wonder how Nina is managing with this as clearly we do need to grasp the path of a prescription request from the front counter to the dispensing of medicines. Mo had disappeared and I had lost my <i>'shadowee'</i>...</p>                                                                                                                                                                                                                                                                                                                                                                                                                                                                                                                                                                                                                                                                                                                                                                                                                                      |

|                                                                                                                                                                                                                                 |                                                                                                                                                                                                                                                                                                                                                                                                                                                                                                                                                                                                                                                                                                                                                                                                                                                                                                                                                                                                                                                                                                                                                                                                                                                                                                                                                                                                                                                                                                                                                                                                                                                                                                                                                                                                                                                                                                                                                                                                                                                                                                                                                                                                                                                                                                                                                   |
|---------------------------------------------------------------------------------------------------------------------------------------------------------------------------------------------------------------------------------|---------------------------------------------------------------------------------------------------------------------------------------------------------------------------------------------------------------------------------------------------------------------------------------------------------------------------------------------------------------------------------------------------------------------------------------------------------------------------------------------------------------------------------------------------------------------------------------------------------------------------------------------------------------------------------------------------------------------------------------------------------------------------------------------------------------------------------------------------------------------------------------------------------------------------------------------------------------------------------------------------------------------------------------------------------------------------------------------------------------------------------------------------------------------------------------------------------------------------------------------------------------------------------------------------------------------------------------------------------------------------------------------------------------------------------------------------------------------------------------------------------------------------------------------------------------------------------------------------------------------------------------------------------------------------------------------------------------------------------------------------------------------------------------------------------------------------------------------------------------------------------------------------------------------------------------------------------------------------------------------------------------------------------------------------------------------------------------------------------------------------------------------------------------------------------------------------------------------------------------------------------------------------------------------------------------------------------------------------|
|                                                                                                                                                                                                                                 | <p>(Fieldnote, Willow, 03/01/2018, DS)</p> <p>Mo hands a prescription over to Rashida part way through its preparation asking her to <i>'take over please'</i> - a quiet negotiation met with no resistance and a seamless transfer of a task part way through. Mo says to Ali, who's recently arrived for his shift, <i>'we need to check the orders'</i>. Ali lifts up a heavy crate of medicines from the floor and they both go to the back of the pharmacy.</p> <p>(Fieldnote, Willow, 03/01/2018, DS)</p>                                                                                                                                                                                                                                                                                                                                                                                                                                                                                                                                                                                                                                                                                                                                                                                                                                                                                                                                                                                                                                                                                                                                                                                                                                                                                                                                                                                                                                                                                                                                                                                                                                                                                                                                                                                                                                   |
| <p>Prescriptions filed for collection act as a record to check the right patient has the right drug</p>                                                                                                                         | <p>All four pharmacies implemented similar process for patients to pick up their medicines. This description from Foxglove denotes how it's done:</p> <p>After checking the medicines in the basket with the medicines listed on the prescription, Zane, the pharmacist bags up the medicines and seals the bag with a pharmacy bag label. The prescription is put in a white plastic basket that will go through to the front counter for filing alphabetically by patient's surname in a drawer under the counter. When a patient comes in to pick up a prescription the staff search through this filing system for the prescription. Aiza tells me the most important thing to check is the patient's address: <i>'so many patients here have the same name.'</i> Sameer, at Willow also echoed this point: there are so many people with the same name at the pharmacy that staff <i>'can't go on name. I don't care if [a patient] can't speak English. If you can't say your address you won't get your prescription.'</i> He draws my attention to the reminder notes stuck to the collection drawers instructing staff to search on address first and to match the bagged up drugs to the prescription.</p> <p>(Fieldnote, Foxglove and Willow, 10/01/2019, 16/01/2019 &amp; 24/01/19, NF)</p>                                                                                                                                                                                                                                                                                                                                                                                                                                                                                                                                                                                                                                                                                                                                                                                                                                                                                                                                                                                                                                           |
| <p>Storing prescriptions with the <i>'card'</i> or the <i>'map'</i> which denotes the medicines for the dosette patients. The prescription becomes part of the checking process alongside the CARD/MAP and the dosette box.</p> | <p>Anjali, a pharmacist, takes me through the dosette checking process. She starts with the MAP - a paper record of which drugs the patient is on and at which time points during the day they should be taken. She reiterates that <i>'if any changes happen, changes must be noted down on the MAP by hand.'</i> The next thing is to check the prescription with the MAP, but <i>'the MAP is gospel'</i>. Anjali explains the next step is to <i>'go down the MAP and tick off on the prescription if the drugs are on the MAP. It's also a double check on the labelling process.'</i> While I'm doing this, says Anjali, I also check on the doses etc. Once these checks have been done, Anjali puts the prescription away in the basket that belongs to the patient whose dosette she is checking, before she can begin to check the capsules and tablets in the dosette box.</p> <p>(Fieldnote, Lilac, 14/03/2019, NF)</p> <p>There were two people working in the dosette area on my arrival – Saleem, the second pharmacist on 'checking' and Nadira, an apprentice technician. Saleem inspects a dosette, flicking his finger underneath to make the tablets jump and rotating it at various angles to inspect inside the individual cells. He then signs line by line against each medication on the printed lists stuck into the dosette box cover. This one had <i>'no complications.'</i> The dosette area is a narrow rectangular room with counter down the left hand side as you enter from the dispensary. Saleem is on the right hand side of the room, standing up and perched behind a stack of green crates all containing dosettes that need checking. Saleem tells me that he first checks the prescription against the <i>'card'</i> (a plastic wallet containing a printed Word document with the patient's name, medicines, medication review date). This is also stored in electronic form on the computer. Having established that the card and the prescription are the same, he then checks the contents of the dosette box. He explains that the dosette box, the card and the prescription need to agree with each other. My sense is that <i>'the card'</i> is the working or master document in guiding their practices around checking and making up the boxes.</p> <p>(Fieldnote, Lilac, 05/11/2018 DS)</p> |



### Caring for each other

Caring for each other encompasses a number of practices to ensure safe working as a team. Members of staff were always alert, always listening and ready to take initiative. Staff were able to report errors without fear of negative consequences and we experienced a strong commitment to social cohesion.

Throughout our fieldwork we observed staff diligently pursuing their individual tasks but always poised and available to help a colleague e.g. find a drug, check/sign-off a prescription, move to the dispensary to serve a growing queue of patients, replenish the robot:

*Caleb, a technician, arrived at work and mumbled something. Rohima turned to him and said "she's gonna have to call back in half an hour for dosette box issues". I realised I had no idea which question she was responding to, or where it had come from. There is such a strong sense in this workplace of people being on the alert to subtle cues from colleagues around the site and I realise I am not always 'tuned in' and wonder at what seems like an 'extra sense' operating between its members to keep things flowing.*

(Fieldnote, Willow, 03/01/2018, DS)

We often witnessed staff huddled together to solve a problem, with junior staff encouraged to offer solutions, define processes or suggest procedural changes:

*Caleb who has been in 'production' appears and strikes up a conversation with Jimi, the pharmacy owner - a discussion about Epilim [sodium valproate] 100 and 200 and stability issues. Caleb suggests that as they use so much of these items in one production run he wonders if they could change its status from 'external' to 'production'. Jimi considers it and answers back "if we only filled it once at production, turnover is high." Mo, the pharmacist comes over and joins in, suggesting they ask someone. Jimi suggests that Caleb phone Sanofi, the drug company, to ask how long the tablets can remain out of the packets.*

(Fieldnote 09/01/2018, Willow pharmacy, DS)

1  
2  
3 'Externals' add considerable extra work to dosette production as they are dealt with manually,  
4 but this exchange also highlights how notions of 'safety' incorporate understandings of supply  
5 and demand, drug-related storage and stability, alongside a welcoming of ideas by senior staff.  
6  
7  
8

9  
10 We also observed open discussion as challenges arise, with junior members of staff taking the  
11 initiative to come up with solutions or refine working routines based on their knowledge and  
12 expertise:  
13  
14

15  
16   
17 *Jimi addressed a small group of staff, reflecting on a recent 'deblistering problem' when*  
18 *more than one brand of pill ended up in the same container. He told them to "be alert"*  
19 *and made some suggestions for avoiding this in future, acknowledging how difficult it is*  
20 *amidst a "sea of gliclazide".*  
21  
22  
23

24  
25 *A few days later, Laila (dispenser responsible for dosettes) spends her lunch break*  
26 *creating a 'deblistering SOP'. With three steps typed up, she asks Saleem, a pharmacist,*  
27 *what step four should be, adding "I can't believe this – it is like the easiest thing we do"*  
28 *By the end of the lunch break she has five steps: "I will show it to Sameer and Caleb...this*  
29 *is what we do".*  
30  
31  
32  
33

34  
35 *I was struck by the bottom-up, collaborative nature of this exercise. Safety was being*  
36 *worked out on the hoof with everyone included, acknowledgement of its complexity and*  
37 *overall, a sense of commitment and fun. But the formalisation of this into a document*  
38 *seemed at odds with their usual approach of just asking each other.*  
39  
40  
41  
42

43  
44 *I learn a few days later that the SOP is now an A4 sheet with 12 bullet points stuck on*  
45 *the wall of which Laila is clearly proud. Nina watched Laila stage a quiz in which she*  
46 *tested Linda's knowledge, with Naihra joking from the sidelines. It is imperfect in its*  
47 *detail, and appears incomplete.*  
48  
49  
50  
51

52  
53 *Nina asked "Why did you have to do a SOP...have you devised a new routine?"*  
54  
55  
56  
57  
58  
59

1  
2  
3 *Laila “No, it was in our heads. Everyone knew, but it wasn’t written down”*

4  
5  
6 *Everyone was happy. The equilibrium was restored. The SOP is not so much an*  
7 *instruction of what to do but a reflection of what they now do, a product of teamwork*  
8 *and a consolidation of their collective knowledge.*

9  
10  
11  
12  
13 (Fieldnotes, Willow, 23/01/2018, DS)

14  
15  
16  
17  
18  
19 This care for one another created an environment which allowed staff to work collaboratively  
20 and openly resolve errors. At Willow and Foxglove in particular, staff were encouraged to  
21 identify and discuss errors which were regarded as an inevitable aspect of best practice:

22  
23  
24  
25  
26 *if you haven’t spotted any today, are you doing your job properly or are you asleep on*  
27 *the job, just letting things through? Errors keep you on your toes.*

28  
29 (Interview, Pharmacist, Foxglove, 04/02/2019)

30  
31  
32 In Woodland pharmacies, the category of ‘error’ was noticeably broad and included:  
33 discrepancies arising when patient’s medication changed on hospital discharge; robot errors  
34 (e.g. broken tablets; tablets ‘jumping’ between cells). One consequence of this broad  
35 description that incorporated both ‘human’ and ‘technological’ error was that it made talk  
36 about errors commonplace, easy, collegiate and – importantly – actionable:

37  
38  
39  
40  
41  
42  
43 *Aiza has grabbed one set of prescriptions belonging to one patient, or so it would seem.*  
44 *Quickly she has spotted an error and tells me “this is something you should see. There’s a*  
45 *mix up on names. Two patients with same surname but different addresses – someone*  
46 *has put both prescriptions together.” Aiza lays out the four prescriptions on the island*  
47 *worktop for me to see that indeed two belong to a ‘D’ and two belong to a ‘S’ but they*  
48 *have the same surname. She shows Raheem the error – “I almost made up one*  
49 *prescription for two people!” She does this in a matter of fact, upbeat way. There’s no*

1  
2  
3 *blame that it was someone else who put the prescriptions together initially. It's as if*  
4 *she's taken responsibility for almost making the error herself, had she not checked the*  
5 *names on the top of the prescription so carefully.*

6  
7  
8  
9 (Fieldnote, Foxglove, 16/01/19, NF)

### 10 11 12 13 14 **Caring for the patient**

15  
16 Finally, safety emerges out a shared concern to care for patients; automation has not  
17 diminished relationships between staff and patients (“*we know our dosette patients*”). There  
18 are sticky notes and ‘*handover sheets*’ on the dispensary walls acting as reminders of: ‘*dosette*  
19 *patients*’ holidays/extra dosettes needed; hospital admissions; medication changes. Staff often  
20 made themselves available for dosette queries on their days off.

21  
22  
23  
24  
25  
26  
27 At Poppy, Marie, a dispenser, explained how she used her initiative to adapt their routine for  
28 labelling dosettes to accommodate a patient with too many medicines for one dosette (22  
29 morning; 17 midday; six teatime; 18 bedtime). Usually one inlay is placed in each dosette listing  
30 the medication it contains, its appearance and dose instructions. Marie explained ‘we actually  
31 make two dosette boxes for her, because it doesn’t all fit into [one] box. So she has her pain  
32 medications in one box, and in the other box she has the rest.’ When Marie imagined how the  
33 dosette might be used beyond the pharmacy, she placed two inlays within each dosette, so  
34 each box listed the patient’s full regimen:

35  
36  
37  
38  
39  
40  
41  
42  
43 *So if she ever went into hospital, say if she only grabbed one dosette box and she only*  
44 *took the pain one and they thought, oh, she's only on painkillers, and she didn't take the*  
45 *others (...) It will still have the whole list, so then they'll say to her, "Oh, where's your*  
46 *other medication because it's on this?" (...) Yeah, it dawned on me and she has to go*  
47 *back into hospital, and I don't know what it's like, if she's elderly and she's rushing, she*

1  
2  
3 *might only pick up one dosette, and then what? The hospital aren't going to know what*  
4 *she's on.*

5  
6  
7 (Interview, Dispenser, Poppy, 29/09/2019)  
8  
9  
10

11 The following extract expresses the reciprocity and strength of staff-patient relationships which  
12 endure and surpass the role of automation:  
13  
14

15  
16 *Laila and Saleem are back from their surgery visits to pick up the daily prescriptions.*  
17 *Laila is full of chatter and excitement and has a story to tell. She says that she went into*  
18 *the surgery and it was so full, people everywhere and a really long queue. As she waited,*  
19 *a man, "whose dosette we make up" came up to her and "touched her feet, thanked her*  
20 *and said pray for me." The three of us talk about what this might mean. I asked Laila "is*  
21 *he grateful because you make up his dosettes?" "I don't know" she replied, "but I was so*  
22 *embarrassed. Everyone was watching me." Saleem asked if she was "anything to him,*  
23 *like an aunty?" "I'm nothing to him!" exclaimed Laila, "I'm just the girl in the pharmacy."*  
24  
25  
26  
27  
28  
29  
30  
31 (Fieldnote, Willow, 08/01/2018, NF)  
32  
33  
34  
35  
36  
37  
38  
39  
40  
41  
42  
43  
44  
45  
46  
47  
48  
49  
50  
51  
52  
53  
54  
55  
56  
57  
58  
59  
60

1  
2  
3 Several participants emphasised the importance of getting the right drug to the right patient at  
4 the right time as their top safety priority. Staff speculated on imaginary patients and future  
5 imagined scenarios by way of performing safety here-and-now, maintaining a rhetorically  
6 persuasive account of their high risk environment and embedding these future abstractions  
7 into material structures and systems in-house:<sup>36</sup>  
8  
9  
10  
11

12  
13 *You have to be accurate on what you do. Be prepared, because obviously you have to*  
14 *always double check what you do. It doesn't matter whichever job you do, and especially*  
15 *if you work in a pharmacy with medication, it's got to do with someone's life. As I said, if*  
16 *you give them something wrong, they could end up in hospital, they don't know where*  
17 *they're going to end up; they might die, or whatever!*  
18  
19

20  
21 (Interview, Dispenser, Foxglove, 04/02/2019)  
22  
23

24  
25 *Yes, my main worry is a mistake being made, so I have that at the top of my brain all the*  
26 *time. I'm constantly checking that everything is right, that it is the right meds, it's the*  
27 *right strength, you know the right tablet, every step. (...) Because I'd hate it. (...) like if it*  
28 *was my nan's meds or something like that and she said, "Oh, a mistake has been made*  
29 *and I've taken the wrong meds!" I wouldn't be very happy, I'd think, well, I think the*  
30 *whole point of the dosette box is to make sure that vulnerable people, like elderly or*  
31 *those who can't handle their meds, it's done for them in the correct way. (...) It is a*  
32 *constant worry, it's a lot of pressure.*  
33  
34  
35  
36  
37  
38  
39

40 (Interview, Dispenser, Lilac, 13/01/2020)  
41  
42

### 43 **Polypharmacy as a safety issue – whose responsibility?**

44  
45  
46  
47  
48  
49  
50  
51  
52  
53  
54  
55  
56  
57  
58  
59  
60

Our study revealed an important paradox. On the one hand, polypharmacy was visible, pervasive and productive of numerous working routines. On the other, polypharmacy *per se* was rarely discussed as a safety concern, either between pharmacy staff or between pharmacist and GP. Safety meant close attention to practices ensuring medicines were dispensed as prescribed, and correcting errors pertaining to individual drugs through the clinical check. It did not mean actively challenging polypharmacy *per se*, even in situations where the volume of prescribing (10+ or 15+ items) might indicate 'high risk'.

Table 5 illustrates the tension pharmacy staff articulate between dispensing 'safely' in the context of inherently risky lists of multiple medicines, from a professional position which distances them from the act of prescribing, the responsibility for which is firmly with the prescriber, usually the GP.

**Table 5: polypharmacy and safety**

| Tension pharmacy staff face between dispensing multiple medicines safely and ability to challenge instances of polypharmacy | Examples from fieldnotes and interviews                                                                                                                                                                                                                                                                                                                                                                                                                                                                                                                                                                                                                                                                                                                                                                                                                                                                                                                                                                                                                                                                                                                                                                                                           |
|-----------------------------------------------------------------------------------------------------------------------------|---------------------------------------------------------------------------------------------------------------------------------------------------------------------------------------------------------------------------------------------------------------------------------------------------------------------------------------------------------------------------------------------------------------------------------------------------------------------------------------------------------------------------------------------------------------------------------------------------------------------------------------------------------------------------------------------------------------------------------------------------------------------------------------------------------------------------------------------------------------------------------------------------------------------------------------------------------------------------------------------------------------------------------------------------------------------------------------------------------------------------------------------------------------------------------------------------------------------------------------------------|
| Clinical checks and the distancing of the pharmacy from polypharmacy as a safety concern                                    | When I ask Mo about checking the dosettes, he says this is a ' <i>clinical check and an accuracy check</i> '. When I ask what a clinical check is he tells me it is about looking for things like interactions between the meds and checking if a dose is too high for example. He goes on to explain that it might be ' <i>accurate but not safe!</i> ' Mo says that the checks will have been done in the last round (by which he means same patient, last month's round of dosettes) but that they check every round nevertheless. I cautiously ask about the fact that some patients are on very long lists of medicines - as this is something we are particularly interested in. He says that often there is a ' <i>primary</i> ' condition but that sometimes drugs cause side effects and this might lead to other prescriptions. Mo concedes this is difficult, and goes on to explain that the [pharmacy conducted] Medicine Use Reviews (MURs) are mainly about how and if the patient is <i>using</i> the meds... if there are adherence or side effects problems - but it's not a ' <i>full clinical</i> ' review about whether the drugs are working for example. He says that this is mainly the responsibility of the prescriber. |

|                                                                           |                                                                                                                                                                                                                                                                                                                                                                                                                                                                                                                                                                                                                                                                                                                                                 |
|---------------------------------------------------------------------------|-------------------------------------------------------------------------------------------------------------------------------------------------------------------------------------------------------------------------------------------------------------------------------------------------------------------------------------------------------------------------------------------------------------------------------------------------------------------------------------------------------------------------------------------------------------------------------------------------------------------------------------------------------------------------------------------------------------------------------------------------|
|                                                                           | <p>(Fieldnote Willow, 11/12/2018, DS)</p> <p>NF: Is it ever the pharmacist's role to talk to patients about stopping the medicines or ...?</p> <p>Zane: Sometimes ... well, we wouldn't initiate the stop here, no.</p> <p>NF: Right.</p> <p>Zane: If there's a stop, like for example, if a patient has been given an antibiotic, some of them interact with cholesterol medications, so you just need to let them know to stop taking that [cholesterol] medication for a week.</p> <p>NF: Like temporarily?</p> <p>Zane: Yeah, but it's just a temporary stop. We never say completely stop taking it, because ultimately that's the doctor's decision.</p> <p>(Interview, Pharmacist, Foxglove, 06/02/2019)</p>                             |
| <p>Polypharmacy as a norm but staff not in a position to challenge it</p> | <p>In this interview, Raheem recounted his shock of having to dispense a prescription of over 10 items of medication to a young child. NF asked him if he had the same sense of shock when he's making up a prescription of many items for an older person:</p> <p>Raheem: Yes, but it's not as much because - I know it sounds bad - but I'm a bit used to it here. And I seem more shocked when I see a 65 year old with less medication than usual.</p> <p>NF: Oh right</p> <p>Raheem: We actually had a lady that was around about 66 or something, she only took two medication and that just for pain maybe, and it was no diabetes, gastric or anything else, so I was shocked.</p> <p>(Interview, Technician, Foxglove, 04/02/2019)</p> |



## DISCUSSION

Our analysis illuminates the ongoing, collaborative work that constitutes safety across four community pharmacies. The end towards which this work is focused is ‘safe’ dispensing of medicines, broadly understood as ‘right drug, right patient, right time’. The means by which this is achieved is a highly nuanced, ongoing process of organising and reorganising, negotiation and renegotiation. Safety is not fixed or inflexible – as might be assumed in a system standardised by protocols – but is in constant flux and open for adaptation by staff at all levels. From this perspective safety is a verb, not a noun.

Patient safety was not assured *because of* the implementation of technologies such as dispensing and dosette robots, dosettes or electronic prescribing, but emerged out of a shared concern by pharmacy staff to ‘care’. Standard operating procedures did not drive action, but emerged out of collective action; the most useful ones were unfinished ‘work-in-progress’, flexible scripts that remained open to further adaptation (e.g. the deblistering SOP, the robot ‘protocol’). In addition to learning from errors, staff shared stories of caring for a collective imaginary – imagined scenarios of what *might happen* if medicines are not dispensed carefully and safely. The collective imaginary is rhetorically powerful, effective in sustaining staff orientation towards safety practices in an inherently risky context. Care is the glue that ensures patient safety and encompasses care for relevant technologies, care for each other and care for the patient. Following a Safety II approach, we have shown how pharmacy staff continuously adapt their routines to ensure ‘as many things as possible go right’ and that medicine safety can be assured ‘to succeed under varying conditions’.<sup>19</sup> Sophisticated understandings of how the everyday actions of healthcare staff produce safety are essential as the organisational contexts within which healthcare is delivered become increasingly complex.

1  
2  
3 The absence of explicit talk about polypharmacy, or the relationships between polypharmacy  
4 and safety - even though we became known as the 'polypharmacy researchers' - surprised us.  
5  
6 This was not unique to the pharmacies in our study; we did not observe naturally occurring talk  
7 about polypharmacy in the GP practices taking part in our wider APOLLO-MM study either (not  
8 yet published). Whilst the pharmacists, technicians and dispensers worked hard to ensure  
9 'safety' for their patients affected by polypharmacy, they did not consider they had any  
10 legitimate warrant to challenge it, and located the responsibility for the prevalence of  
11 polypharmacy with different parts of the health system, usually general practitioners. The  
12 Medication Use Review – as the name suggests – was framed by participants as an exploration  
13 of 'use' of drugs, not an opportunity to question polypharmacy per se. Patients affected by  
14 polypharmacy did not constitute a target group for MURs.<sup>37</sup>  
15  
16  
17  
18  
19  
20  
21  
22  
23  
24  
25  
26

### 27 **Strengths and weakness of this study**

28  
29 To our knowledge this is the first ethnographic study conducted in community pharmacy that  
30 has focused on polypharmacy and its intersection with safety practices. A key strength of our  
31 ethnographic approach was the opportunity to spend many hours observing the detailed  
32 practices of staff 'doing safety' in dispensing medicines in the particular context in which it  
33 happens, rather than relying on abstracted interview accounts alone. Although our pharmacies  
34 varied in terms of the populations they served, all belonged to independent pharmacy groups  
35 (3-5 pharmacies in each group). Our findings may not translate readily to larger chain  
36 pharmacies, but our interpretations may offer useful ways of conceptualising safety across UK  
37 and international settings.  
38  
39  
40  
41  
42  
43  
44  
45  
46  
47  
48  
49  
50  
51  
52  
53  
54  
55  
56  
57  
58  
59  
60

1  
2  
3 Not everything was easily visible to us as ethnographers. We did not have access to some  
4 aspects of pharmacy work, such as management decisions about 'running the business' of a  
5 community pharmacy, or the relationship between the financial and clinical dimensions of  
6 pharmacy work. This may have special relevance in polypharmacy in a health system such as  
7 the NHS where dispensing fees are paid to pharmacies on a 'per item' basis. Our study  
8 contributes to a body of qualitative research by foregrounding 'hidden work' and illuminating  
9 the creative 'tinkering', practical judgments and situated knowledge that is often missing from  
10 professional accounts and policy documents, but which is essential to ensuring technology  
11 assisted routines are safely implemented.<sup>13,38-41</sup> In contrast to previous work conducted in  
12 pharmacy settings our observations show that staff are adept at maintaining safe practices and  
13 resolving errors despite constraints such as limited space and interrupted work flows.<sup>42,43</sup>  
14  
15  
16  
17  
18  
19  
20  
21  
22  
23

### 24 **The meaning of the study**

25 Our study sheds light on the often hidden work that pharmacy staff undertake in increasingly  
26 complex, high risk settings fueled by escalating prescribing. Whilst some policy literature  
27 acknowledges a need to help 'practitioners manage workload related to polypharmacy in order  
28 to improve medication safety',<sup>6</sup> we argue that policymakers could take greater account of  
29 practice 'on the ground' to inform guidelines by acknowledging how pharmacy professionals  
30 are currently working to ensure medication safety in high risk situations, such as those  
31 presented by polypharmacy. Furthermore, the policy literature focuses on distinguishing  
32 between appropriate and problematic polypharmacy.<sup>18,44,45</sup> However, these are terms that we  
33 did not hear used in the pharmacy settings we were given access to. This suggests that policy  
34 level pronouncements have not found their way to those on the ground or that the terms used  
35 by policy makers and academics do not resonate with those working on the frontline of  
36 polypharmacy.  
37  
38  
39  
40  
41  
42  
43  
44  
45  
46  
47  
48  
49

### 50 **Future research**

1  
2  
3 There have been calls for a greater role of pharmacists in managing high-risk and problematic  
4 polypharmacy,<sup>6,46</sup> including the integration of clinical pharmacists within primary care to deliver  
5 Structured Medication Reviews under the new 2020/21 GP Contract to patients affected by  
6 complex problematic polypharmacy.<sup>47</sup> Community pharmacists in our study did not feel it was  
7 within their remit to challenge prescribing regimens initiated by other healthcare professionals  
8 in the healthcare system. Further research is needed to understand how these different  
9 professionals (community pharmacists; clinical pharmacists within general practice settings;  
10 prescribing doctors and nurses) and new professional arrangements work together to negotiate  
11 and address complex polypharmacy and with what consequences for patients. We will consider  
12 the role of general practitioners and other health professionals in supporting or challenging  
13 polypharmacy in our wider research.  
14  
15  
16  
17  
18  
19  
20  
21  
22  
23  
24  
25  
26  
27  
28  
29  
30  
31  
32  
33  
34  
35  
36  
37  
38  
39  
40  
41  
42  
43  
44  
45  
46  
47  
48  
49  
50  
51  
52  
53  
54  
55  
56  
57  
58  
59  
60

Peer review only

1  
2  
3 **FUNDING STATEMENT:** This work was supported by the National Institute for Health Research  
4 (NIHR) Clinician Scientist Award number CS-2015-15-004. Additionally, this work was supported  
5 by the NIHR Collaboration for Leadership in Applied Health Research and Care (CLAHRC) North  
6 Thames. The views expressed are those of the author(s) and not necessarily those of the NHS,  
7 the NIHR or the Department of Health and Social Care.  
8  
9  
10  
11  
12

13 **A COMPETING INTERESTS STATEMENT:** Non-declared  
14  
15

16 **AUTHOR CONTRIBUTIONS.** The study was conceived by DS. Data gathering and data analysis  
17 were jointly undertaken by DS and NF. NF wrote the first draft of the paper. Both authors  
18 revised and finalised the manuscript.  
19  
20  
21  
22

23 **ACKNOWLEDGMENTS.** We would like to thank staff from the four community pharmacies who  
24 agreed to participate in this study, colleagues at QMUL who commented on an early draft of  
25 the manuscript, and our Expert Advisory Group and Patient Panel for their support of our  
26 research.  
27  
28  
29  
30

31 **ETHICS APPROVAL** The project has ethics approval from Leeds West Research Ethics Committee  
32 (IRAS project ID: 205517; REC reference 16/YH/0462).  
33  
34  
35  
36

37 **DATA SHARING STATEMENT** Our ethics approval and consent procedures were based on the  
38 anonymity of the individuals who participated, hence further access to the full data set cannot  
39 be granted.  
40  
41  
42  
43  
44  
45  
46  
47  
48  
49  
50  
51  
52  
53  
54  
55  
56  
57  
58  
59  
60

## References

1. Smith J. Building a Safer Nhs for Patients: Improving Medication Safety. 2004 [Available: [https://webarchive.nationalarchives.gov.uk/+/http://www.dh.gov.uk/en/Publicationsandstatistics/Publications/PublicationsPolicyAndGuidance/DH\\_4071443](https://webarchive.nationalarchives.gov.uk/+/http://www.dh.gov.uk/en/Publicationsandstatistics/Publications/PublicationsPolicyAndGuidance/DH_4071443) accessed 07/04/2020.
2. Hidle U. Implementing Technology to Improve Medication Safety in Healthcare Facilities: A Literature Review. *J N Y State Nurses Assoc* 2007;38(2):4-9.
3. Wolf ZR. Pursuing Safe Medication Use and the Promise of Technology. *Medsurg Nursing* 2007;16(2):92-100.
4. World Health Organisation. Medicines without Harm 2017 [Available: <https://apps.who.int/iris/bitstream/handle/10665/255263/WHO-HIS-SDS-2017.6-eng.pdf;jsessionid=1FA9FFC80FAEA5ADA5E9359C55375C22?sequence=1> accessed 07/04/2020.
5. Department of Health and Social Care. The Report of the Short Life Working Group on Reducing Medication-Related Harm 2018 [Available: [https://assets.publishing.service.gov.uk/government/uploads/system/uploads/attachment\\_data/file/683430/short-life-working-group-report-on-medication-errors.pdf](https://assets.publishing.service.gov.uk/government/uploads/system/uploads/attachment_data/file/683430/short-life-working-group-report-on-medication-errors.pdf) accessed 07/04/2020.
6. World Health Organisation. Medication Safety in Polypharmacy 2019 [Available: <https://apps.who.int/iris/bitstream/handle/10665/325454/WHO-UHC-SDS-2019.11-eng.pdf?ua=1> accessed 07/04/2020.
7. Sheikh A, Panesar SS, Larizgoitia I, et al. Safer Primary Care for All: A Global Imperative. *Lancet Glob Health* 2013;1(4):e182-e83. doi: 10.1016/S2214-109X(13)70030-5
8. Avery AJ, Ghaleb M, Barber N, et al. The Prevalence and Nature of Prescribing and Monitoring Errors in English General Practice: A Retrospective Case Note Review. *Br J Gen Pract* 2013;63(613):e543-53. doi: 10.3399/bjgp13X670679
9. AGE UK. More Harm Than Good. Why More Isn't Always Better with Older People's Medicines 2019 [Available: [https://www.ageuk.org.uk/globalassets/age-uk/documents/reports-and-publications/reports-and-briefings/health--wellbeing/medication/190819\\_more\\_harm\\_than\\_good.pdf](https://www.ageuk.org.uk/globalassets/age-uk/documents/reports-and-publications/reports-and-briefings/health--wellbeing/medication/190819_more_harm_than_good.pdf) accessed 07/04/2020.
10. Mann C, Anderson C, Avery AJ, et al. Clinical Pharmacists in General Practice: Pilot Scheme 2018 [Available: <https://www.nottingham.ac.uk/pharmacy/documents/generalpracticeyearfwdrev/clinical-pharmacists-in-general-practice-pilot-scheme-full-report.pdf> accessed 07/04/2020.

- 1  
2  
3 11. Phipps DL, Jones CEL, Parker D, et al. Organizational Conditions for Engagement in Quality and Safety  
4 Improvement: A Longitudinal Qualitative Study of Community Pharmacies. *BMC Health Serv Res*  
5 2018;18(1):783. doi: 10.1186/s12913-018-3607-7  
6
- 7  
8 12. Hong K, Hong YD, Cooke CE. Medication Errors in Community Pharmacies: The Need for  
9 Commitment, Transparency, and Research. *Research in Social and Administrative Pharmacy*  
10 2019;15(7):823-26.  
11
- 12 13. Phipps DL, Noyce PR, Parker D, et al. Medication Safety in Community Pharmacy: A Qualitative Study  
13 of the Sociotechnical Context. *BMC Health Serv Res* 2009;9:158. doi: 10.1186/1472-6963-9-158  
14  
15
- 16 14. Masnoon N, Shakib S, Kalisch-Ellett L, et al. What Is Polypharmacy? A Systematic Review of  
17 Definitions. *BMC Geriatrics* 2017;17:230. doi: 10.1186/s12877-017-0621-2  
18
- 19 15. Payne RA. The Epidemiology of Polypharmacy. *Clin Med (Lond)* 2016;16(5):465-69. doi:  
20 10.7861/clinmedicine.16-5-465  
21  
22
- 23 16. Avery AA, Barber N, Ghaleb M, et al. Investigating the Prevalence and Causes of Prescribing Errors in  
24 General Practice: The Practice Study: General Medical Council; 2012 [Available:  
25 [http://www.gmc-](http://www.gmc-uk.org/Investigating_the_prevalence_and_causes_of_prescribing_errors_in_general_practice_The_PRACTiCe_study_Reoprt_May_2012_48605085.pdf)  
26 [uk.org/Investigating\\_the\\_prevalence\\_and\\_causes\\_of\\_prescribing\\_errors\\_in\\_general\\_practice\\_](http://www.gmc-uk.org/Investigating_the_prevalence_and_causes_of_prescribing_errors_in_general_practice_The_PRACTiCe_study_Reoprt_May_2012_48605085.pdf)  
27 [The\\_PRACTiCe\\_study\\_Reoprt\\_May\\_2012\\_48605085.pdf](http://www.gmc-uk.org/Investigating_the_prevalence_and_causes_of_prescribing_errors_in_general_practice_The_PRACTiCe_study_Reoprt_May_2012_48605085.pdf) accessed 07/04/2020.  
28
- 29  
30 17. Sears K, Scobie A, Mackinnon NJ. Patient-Related Risk Factors for Self-Reported Medication Errors in  
31 Hospital and Community Settings in 8 Countries. *Can Pharm J (Ott)* 2012;145(2):88-93. doi:  
32 10.3821/145.2.cpj88  
33
- 34 18. The King's Fund. Polypharmacy and Medicines Optimisation - Making It Safe and Sound 2013  
35 [Available:  
36 [https://www.kingsfund.org.uk/sites/default/files/field/field\\_publication\\_file/polypharmacy-](https://www.kingsfund.org.uk/sites/default/files/field/field_publication_file/polypharmacy-and-medicines-optimisation-kingsfund-nov13.pdf)  
37 [and-medicines-optimisation-kingsfund-nov13.pdf](https://www.kingsfund.org.uk/sites/default/files/field/field_publication_file/polypharmacy-and-medicines-optimisation-kingsfund-nov13.pdf) accessed 07/04/2020.  
38
- 39  
40 19. Hollnagel E, Wears RL, Braithwaite J. From Safety-I to Safety-II: A White Paper 2015 [Available:  
41 [https://www.england.nhs.uk/signuptosafety/wp-content/uploads/sites/16/2015/10/safety-1-](https://www.england.nhs.uk/signuptosafety/wp-content/uploads/sites/16/2015/10/safety-1-safety-2-whte-papr.pdf)  
42 [safety-2-whte-papr.pdf](https://www.england.nhs.uk/signuptosafety/wp-content/uploads/sites/16/2015/10/safety-1-safety-2-whte-papr.pdf) accessed 07/04/2020.  
43
- 44  
45 20. Phipps DL, Ashcroft DM. An Investigation of Occupational Subgroups with Respect to Patient Safety  
46 Culture. *Saf Sci* 2012;50(5):1290-98. doi: 10.1016/j.ssci.2011.12.016  
47
- 48 21. Thomas CE, Phipps DL, Ashcroft DM. When Procedures Meet Practice in Community Pharmacies:  
49 Qualitative Insights from Pharmacists and Pharmacy Support Staff. *BMJ Open* 2016;6(6) doi:  
50 10.1136/bmjopen-2015-010851  
51  
52  
53  
54  
55  
56  
57  
58  
59  
60

- 1  
2  
3 22. Wears RL, Hollnagel E, J. B. Why Is Work-as-Imagined Different from Work-as-Done? In: Wears RL,  
4 Hollnagel E, Braithwaite J, eds. Resilience in Everyday Clinical Work. Farnham Ashgate 2015:249-  
5 64.  
6  
7  
8 23. Swinglehurst D, Fudge N. Addressing the Polypharmacy Challenge in Older People with  
9 Multimorbidity (Apollo-Mm): Study Protocol for an in-Depth Ethnographic Case Study in Primary  
10 Care. *BMJ Open* 2019;9(8):e031601. doi: 10.1136/bmjopen-2019-031601  
11  
12 24. APOLLO-MM. Addressing the Polypharmacy Challenge in Older People 2017 [Available:  
13 [www.polypharmacy.org.uk](http://www.polypharmacy.org.uk) accessed 14/02/2020].  
14  
15  
16 25. McIntosh P. Action Research and Reflective Practice: Creative and Visual Methods to Facilitate  
17 Reflection and Learning. Abingdon, Oxon: Routledge 2010.  
18  
19 26. Goffman E. Regions and Region Behaviour. The Presentation of Self in Everyday Life: London:  
20 Penguin Books 1959.  
21  
22  
23 27. Liu W, Gerdtz M, Manias E. Challenges and Opportunities of Undertaking a Video Ethnographic Study  
24 to Understand Medication Communication. *Journal of Clinical Nursing* 2015;24(23-24):3707-15.  
25 doi: 10.1111/jocn.12948  
26  
27 28. Nvivo Qualitative Data Analysis Software [program]. Version 12 version, 2018.  
28  
29  
30 29. Nicolini D. Practice Theory, Work, and Organization: An Introduction: OUP Oxford 2012.  
31  
32 30. Schatzki TR. A Primer on Practices: Theory and Research. Practice-Based Education: Brill Sense  
33 2012:13-26.  
34  
35 31. Geertz C. Chapter 1/Thick Description: Toward an Interpretive Theory of Culture.'. *The Interpretation*  
36 *of Cultures: Selected Essays, New York, Basic Books* 1973,  
37  
38  
39 32. Royal Pharmaceutical Society. Improving Patient Outcomes—the Better Use of Multi-Compartment  
40 Compliance Aids: Royal Pharmaceutical Society Great Britain; 2013 [Available:  
41 [https://www.rpharms.com/Portals/0/RPS%20document%20library/Open%20access/Support/to](https://www.rpharms.com/Portals/0/RPS%20document%20library/Open%20access/Support/toolkits/rps-mca-july-2013.pdf)  
42 [olkits/rps-mca-july-2013.pdf](https://www.rpharms.com/Portals/0/RPS%20document%20library/Open%20access/Support/toolkits/rps-mca-july-2013.pdf) accessed 07/04/2020].  
43  
44  
45 33. Husain I, Minshull J. Summary of Guidance and Evidence for Use of Multi-Compartment Compliance  
46 Aids (Mccas)  
47  
48 London Medicines Information Service; 2019 [Available: [https://www.sps.nhs.uk/wp-](https://www.sps.nhs.uk/wp-content/uploads/2019/05/SPS_MCCA_briefing_May2019_final.pdf)  
49 [content/uploads/2019/05/SPS\\_MCCA\\_briefing\\_May2019\\_final.pdf](https://www.sps.nhs.uk/wp-content/uploads/2019/05/SPS_MCCA_briefing_May2019_final.pdf) accessed 07/04/2020].  
50  
51  
52 34. Luff P, Heath C, Greatbatch D. Tasks-in-Interaction: Paper and Screen Based Documentation in  
53 Collaborative Activity. *Proceedings of the 1992 ACM conference on Computer-supported*  
54 *cooperative work* 1992:163-70.  
55  
56  
57  
58  
59  
60



- 1  
2  
3 35. Greatbatch D, Luff P, Heath C, et al. Interpersonal Communication and Human-Computer  
4 Interaction: An Examination of the Use of Computers in Medical Consultations. *Interact Comput*  
5 1993;5(2):193-216. doi: 10.1016/0953-5438(93)90018-0  
6  
7  
8 36. Borup M, Brown N, Konrad K, et al. The Sociology of Expectations in Science and Technology. *Technol*  
9 *Anal Strateg Manag* 2006;18(3-4):285-98. doi: 10.1080/09537320600777002  
10  
11 37. Pharmaceutical Services Negotiating Committee. Medicines Use Review (Mur) 2020 [Available:  
12 <https://psnc.org.uk/services-commissioning/advanced-services/murs/> accessed 23/11/2020.  
13  
14  
15 38. Mol A. *The Logic of Care: Health and the Problem of Patient Choice*: Routledge 2008.  
16  
17 39. Swinglehurst D, Greenhalgh T, Russell J, et al. Receptionist Input to Quality and Safety in Repeat  
18 Prescribing in Uk General Practice: Ethnographic Case Study. *BMJ* 2011;343:d6788. doi:  
19 10.1136/bmj.d6788  
20  
21 40. Grant S, Guthrie B. Efficiency and Thoroughness Trade-Offs in High-Volume Organisational Routines:  
22 An Ethnographic Study of Prescribing Safety in Primary Care. *BMJ Qual Saf* 2018;27(3):199-206.  
23 doi: 10.1136/bmjqs-2017-006917  
24  
25  
26 41. Farre A, Shaw K, Heath G, et al. On Doing 'Risk Work' in the Context of Successful Outcomes:  
27 Exploring How Medication Safety Is Brought into Action through Health Professionals' Everyday  
28 Working Practices. *Health Risk Soc* 2017;19(3-4):209-25. doi: 10.1080/13698575.2017.1336512  
29  
30  
31 42. Harvey J, Avery AJ, Ashcroft D, et al. Exploring Safety Systems for Dispensing in Community  
32 Pharmacies: Focusing on How Staff Relate to Organizational Components. *Res Social Adm Pharm*  
33 2015;11(2):216-27. doi: 10.1016/j.sapharm.2014.06.005  
34  
35  
36 43. Knudsen P, Herborg H, Mortensen AR, et al. Preventing Medication Errors in Community Pharmacy:  
37 Frequency and Seriousness of Medication Errors. *Qual Saf Health Care* 2007;16(4):291-6. doi:  
38 10.1136/qshc.2006.018770  
39  
40 44. Rankin A, Cadogan CA, Patterson SM, et al. Interventions to Improve the Appropriate Use of  
41 Polypharmacy for Older People. *Cochrane Database Syst Rev* 2018;9(9):CD008165. doi:  
42 10.1002/14651858.CD008165.pub4  
43  
44  
45 45. Hughes C. Appropriate and Inappropriate Polypharmacy—Choosing the Right Strategy. *Br J Clin*  
46 *Pharmacol* 2020 doi: 10.1111/bcp.14589  
47  
48 46. Royal Pharmaceutical Society. Polypharmacy: Getting Our Medicines Right 2020 [Available:  
49 [https://www.rpharms.com/recognition/setting-professional-standards/polypharmacy-getting-](https://www.rpharms.com/recognition/setting-professional-standards/polypharmacy-getting-our-medicines-right)  
50 [our-medicines-right](https://www.rpharms.com/recognition/setting-professional-standards/polypharmacy-getting-our-medicines-right) accessed 26/11/2020.  
51  
52  
53  
54  
55  
56  
57  
58  
59  
60

- 1  
2  
3 47. National Health Service. Structured Medication Reviews and Medicines Optimisation: Guidance 2020  
4 [Available: [https://www.england.nhs.uk/wp-content/uploads/2020/09/SMR-Spec-Guidance-](https://www.england.nhs.uk/wp-content/uploads/2020/09/SMR-Spec-Guidance-2020-21-FINAL-.pdf)  
5 [2020-21-FINAL-.pdf](https://www.england.nhs.uk/wp-content/uploads/2020/09/SMR-Spec-Guidance-2020-21-FINAL-.pdf) accessed 30/11/2020.  
6  
7  
8  
9  
10  
11  
12  
13  
14  
15  
16  
17  
18  
19  
20  
21  
22  
23  
24  
25  
26  
27  
28  
29  
30  
31  
32  
33  
34  
35  
36  
37  
38  
39  
40  
41  
42  
43  
44  
45  
46  
47  
48  
49  
50  
51  
52  
53  
54  
55  
56  
57  
58  
59  
60

For peer review only

## Staff Interviews (Pharmacy)

The focus of our research is on patients who are prescribed many medicines for their medical conditions (*polypharmacy*). In this interview we would like to **learn about the work you do** and about **who** and **what** is involved.

**So first could you please start off by telling me:**

- **how long you have worked here**
- **your job title and**
- **any training you've done to work here**

1. **What are the key routines – all the different things you have to do - you are involved in that support patients who are prescribed many medicines?**
2. **Please can you select ONE of these routines and talk me through what happens in detail** (*If they struggle to identify a routine we pick one e.g. 'dossette box production' 'repeat dispensing' 'checking routines' 'dossette box preparation' 'deblistering', ordering drugs, 'filling the robot'*)
  - (What is involved in this routine?)
  - (Who is involved in this routine?)
  - Who is responsible for different aspects of this routine?
  - Can you describe a challenge that you have recently encountered while doing this particular work? How did you approach this?
3. **Please would you tell me about the example that you thought about before the interview?**  
(*Pre-interview: Please would you come to the interview prepared to tell us about a particular story or incident, case, prescription or puzzle that has involved a patient who is prescribed many medicines*)
  - Please will you talk me through it?
  - Why did you select this particular example?
  - (What happened / What happened next?)
  - How did this experience make you feel?
  - What did you learn from this experience?
4. **What are your main priorities when managing the prescriptions of people who are prescribed many medicines / when you do your work?**
  - Why is this priority (are these priorities) important to you?
  - How does this priority influence what you do in practice?
  - Can you describe an example of something you have done recently in your work that shows your commitment to this priority?

1  
2  
3 **5. How has the electronic prescribing system changed how you work and**  
4 **what you have to do?**  
5  
6  
7

8 **6. Is there something else you would like to talk about?**  
9  
10  
11  
12  
13  
14  
15  
16  
17  
18  
19  
20  
21  
22  
23  
24  
25  
26  
27  
28  
29  
30  
31  
32  
33  
34  
35  
36  
37  
38  
39  
40  
41  
42  
43  
44  
45  
46  
47  
48  
49  
50  
51  
52  
53  
54  
55  
56  
57  
58  
59  
60

For peer review only
